# Supplementary material for: The impact of cyclometalated and phosphine ligands on the luminescence properties of cycloplatinated(ii) complexes: photophysical and theoretical investigations
Source: Royal Society of Chemistry journal article supplement (doi:10.1039/d1nj04242d), 2021-01-01
Supplement: d1nj04242d1.pdf [file d1nj04242d1.pdf]

32

Complex A, ground state, gas phase

|    |             |             |             |
|----|-------------|-------------|-------------|
| Pt | 0.67650500  | -0.35659100 | 0.00001800  |
| Cl | 2.37246500  | -2.19136800 | 0.00010100  |
| N  | -0.93753400 | -1.65076600 | -0.00019900 |
| C  | -0.82669300 | 0.98818400  | 0.00000200  |
| C  | -2.12433500 | 0.39533300  | -0.00002500 |
| C  | -2.17202400 | -1.06291700 | -0.00003700 |
| C  | -0.81197100 | -2.99025600 | -0.00019700 |
| H  | 0.20571200  | -3.36144000 | -0.00039400 |
| C  | -1.91704400 | -3.83066000 | 0.00000700  |
| H  | -1.77270700 | -4.90534600 | 0.00007500  |
| C  | -3.18809700 | -3.25686700 | 0.00017500  |
| H  | -4.07694500 | -3.88143500 | 0.00033100  |
| C  | -3.31778900 | -1.87313800 | 0.00012200  |
| H  | -4.29312700 | -1.41062300 | 0.00021900  |
| C  | -3.24266600 | 1.24143800  | -0.00005600 |
| C  | -3.14386000 | 2.62289300  | -0.00000400 |
| H  | -4.02829100 | 3.24779400  | -0.00002600 |
| C  | -1.86229300 | 3.16052700  | 0.00005200  |
| C  | -0.71119700 | 2.37860200  | 0.00004200  |
| H  | 0.25734300  | 2.86647800  | 0.00001700  |
| F  | -4.49452400 | 0.72046100  | -0.00012300 |
| F  | -1.73835400 | 4.50050400  | 0.00008300  |
| S  | 2.48368200  | 1.10926000  | -0.00000600 |
| O  | 2.30377100  | 2.59899200  | -0.00012500 |
| C  | 3.55037500  | 0.68352800  | 1.40635400  |
| H  | 2.98838800  | 0.94294400  | 2.30581100  |
| H  | 3.75885600  | -0.38720200 | 1.37696200  |
| H  | 4.45433900  | 1.29413600  | 1.33230600  |
| C  | 3.55023000  | 0.68326100  | -1.40645600 |
| H  | 2.98798500  | 0.94235200  | -2.30584900 |
| H  | 4.45407000  | 1.29409100  | -1.33276800 |
| H  | 3.75887000  | -0.38742300 | -1.37684500 |

32

Complex A, excited state, gas phase

|    |             |             |             |
|----|-------------|-------------|-------------|
| Pt | -0.67079500 | -0.36482200 | 0.00006700  |
| Cl | -2.35003600 | -2.20934100 | -0.00002700 |
| N  | 0.92045800  | -1.63716600 | -0.00000900 |
| C  | 0.78474400  | 0.99124900  | -0.00001600 |
| C  | 2.14061500  | 0.37874500  | -0.00013100 |
| C  | 2.20530300  | -1.01340000 | -0.00010400 |
| C  | 0.83938200  | -2.97131500 | 0.00006500  |
| H  | -0.16513100 | -3.37801300 | 0.00014300  |
| C  | 1.96273400  | -3.79598200 | 0.00003300  |
| H  | 1.82439200  | -4.87127400 | 0.00010900  |
| C  | 3.26333200  | -3.21218400 | -0.00009900 |
| H  | 4.14904500  | -3.83871500 | -0.00015000 |
| C  | 3.37395500  | -1.84782700 | -0.00017000 |
| H  | 4.34351600  | -1.37096300 | -0.00027200 |
| C  | 3.26611100  | 1.28473100  | -0.00026200 |
| C  | 3.12145200  | 2.63662500  | -0.00019100 |
| H  | 3.98550700  | 3.29076100  | -0.00028500 |
| C  | 1.80345700  | 3.17149700  | -0.00002400 |

|   |             |             |             |
|---|-------------|-------------|-------------|
| C | 0.66438500  | 2.37671200  | 0.00004300  |
| H | -0.31093800 | 2.85259400  | 0.00011700  |
| F | 4.52013100  | 0.77377000  | -0.00046700 |
| F | 1.68947700  | 4.51017500  | 0.00005000  |
| S | -2.51173400 | 1.08470600  | 0.00011800  |
| O | -2.34788700 | 2.57750400  | 0.00027200  |
| C | -3.57588500 | 0.64904100  | -1.40554300 |
| H | -3.01921600 | 0.92024200  | -2.30479500 |
| H | -3.76833800 | -0.42474000 | -1.38030500 |
| H | -4.48929200 | 1.24495900  | -1.32765000 |
| C | -3.57600200 | 0.64876000  | 1.40560500  |
| H | -3.01940800 | 0.91979000  | 2.30495600  |
| H | -4.48940400 | 1.24469000  | 1.32775000  |
| H | -3.76844800 | -0.42501700 | 1.38014600  |

32

Complex A, ground state, CH<sub>2</sub>Cl<sub>2</sub> solution

|    |             |             |             |
|----|-------------|-------------|-------------|
| Pt | -0.67007700 | -0.36868100 | 0.00068400  |
| Cl | -2.36685300 | -2.23900200 | -0.00013600 |
| N  | 0.96561800  | -1.64535100 | 0.00047700  |
| C  | 0.81622100  | 0.98974800  | 0.00073900  |
| C  | 2.12250600  | 0.41668800  | -0.00002600 |
| C  | 2.19256100  | -1.04247900 | -0.00016100 |
| C  | 0.86208400  | -2.98734300 | 0.00050200  |
| H  | -0.14699200 | -3.37859700 | 0.00091900  |
| C  | 1.97865000  | -3.81238100 | -0.00011400 |
| H  | 1.84979400  | -4.88864900 | -0.00009500 |
| C  | 3.24136400  | -3.22098300 | -0.00081100 |
| H  | 4.13863300  | -3.83206800 | -0.00135600 |
| C  | 3.34937100  | -1.83436100 | -0.00083000 |
| H  | 4.31921500  | -1.36079400 | -0.00137800 |
| C  | 3.22724700  | 1.28021200  | -0.00058800 |
| C  | 3.10955900  | 2.66149300  | -0.00032600 |
| H  | 3.98564500  | 3.29817500  | -0.00080600 |
| C  | 1.82067800  | 3.17753600  | 0.00059600  |
| C  | 0.68146800  | 2.37900900  | 0.00114500  |
| H  | -0.29525900 | 2.84969200  | 0.00180400  |
| F  | 4.48562100  | 0.77886700  | -0.00145800 |
| F  | 1.67174800  | 4.51874100  | 0.00091300  |
| S  | -2.50463300 | 1.09237900  | -0.00072500 |
| O  | -2.31939500 | 2.58710800  | 0.00030600  |
| C  | -3.56441500 | 0.67646700  | -1.41166900 |
| H  | -2.99604000 | 0.92415200  | -2.31015700 |
| H  | -3.78992700 | -0.39001300 | -1.37917900 |
| H  | -4.46490000 | 1.29175200  | -1.34286800 |
| C  | -3.56760400 | 0.67482200  | 1.40737000  |
| H  | -3.00140800 | 0.92202300  | 2.30736800  |
| H  | -4.46825300 | 1.28969400  | 1.33704500  |
| H  | -3.79247700 | -0.39175100 | 1.37344400  |

55

Complex 1a, ground state, gas phase

|   |            |             |             |
|---|------------|-------------|-------------|
| C | 2.93123400 | -2.88860300 | -0.10365600 |
| H | 2.08716300 | -3.56816800 | -0.14589500 |
| C | 4.25045300 | -3.32470200 | -0.09682000 |
| H | 4.46601100 | -4.38694500 | -0.13611500 |

|    |             |             |             |
|----|-------------|-------------|-------------|
| C  | 5.26284200  | -2.36860900 | -0.03877300 |
| H  | 6.30752300  | -2.66726400 | -0.03102900 |
| C  | 4.93191200  | -1.01889900 | 0.00906900  |
| H  | 5.70457100  | -0.26710500 | 0.05338300  |
| C  | 3.58294000  | -0.62919000 | -0.00156900 |
| C  | 3.06428600  | 0.74088400  | 0.03720300  |
| C  | 3.86619500  | 1.89110600  | 0.08985600  |
| C  | 3.35457300  | 3.17845600  | 0.11523400  |
| H  | 4.00798400  | 4.04096200  | 0.15550300  |
| C  | 1.97232800  | 3.29845400  | 0.08220600  |
| C  | 1.12403900  | 2.19864600  | 0.03073700  |
| H  | 0.06116700  | 2.39901200  | -0.00310100 |
| C  | 1.64147200  | 0.89688400  | 0.01059800  |
| C  | -1.81013700 | 1.01609800  | 1.53486300  |
| C  | -0.89451100 | 0.96069300  | 2.59197100  |
| H  | 0.02181700  | 0.39051700  | 2.48504300  |
| C  | -1.19127100 | 1.65144700  | 3.76867600  |
| H  | -0.50226800 | 1.62424200  | 4.60832700  |
| C  | -2.37963000 | 2.37321900  | 3.84397300  |
| H  | -2.65038400 | 2.92714000  | 4.73774500  |
| C  | -3.22888700 | 2.36827800  | 2.73436600  |
| H  | -4.16795300 | 2.91841000  | 2.75284400  |
| C  | -2.93681600 | -1.11916800 | -0.00967100 |
| C  | -3.30628000 | -1.75413400 | 1.18467800  |
| H  | -2.75317900 | -1.56318200 | 2.09917100  |
| C  | -4.37889400 | -2.64264100 | 1.20540900  |
| H  | -4.65666000 | -3.12790600 | 2.13705800  |
| C  | -5.08824000 | -2.91398600 | 0.03312200  |
| H  | -5.92355000 | -3.60893500 | 0.05024000  |
| C  | -4.71744100 | -2.29415800 | -1.15996600 |
| H  | -5.26046900 | -2.50431200 | -2.07741200 |
| C  | -3.64599800 | -1.39962700 | -1.18387400 |
| H  | -3.36748500 | -0.92387800 | -2.11818600 |
| C  | -1.83823700 | 1.14507200  | -1.45506900 |
| C  | -2.95071700 | 2.00378400  | -1.49751300 |
| H  | -3.61597400 | 2.05991000  | -0.64381000 |
| C  | -3.18425600 | 2.78682600  | -2.62798900 |
| H  | -4.04153200 | 3.45443700  | -2.64933400 |
| C  | -2.32764800 | 2.71186800  | -3.72919500 |
| H  | -2.51706600 | 3.32160000  | -4.60876900 |
| C  | -1.23020500 | 1.85065700  | -3.69832200 |
| H  | -0.56153100 | 1.78448800  | -4.55209900 |
| C  | -0.98314000 | 1.07214400  | -2.56614900 |
| H  | -0.12435700 | 0.40820000  | -2.53703600 |
| N  | 2.61092200  | -1.58480600 | -0.05719300 |
| N  | -2.96213900 | 1.70155900  | 1.60811500  |
| Pt | 0.62322500  | -0.85502600 | -0.05411500 |
| Cl | -0.31265600 | -3.11903700 | -0.14587300 |
| P  | -1.50576100 | 0.03654100  | -0.02324100 |
| F  | 1.43594400  | 4.53495000  | 0.10241700  |
| F  | 5.21905100  | 1.78663200  | 0.11936700  |

55

Complex 1a, excited state, gas phase

|   |            |             |             |
|---|------------|-------------|-------------|
| C | 2.93070800 | -2.87554400 | -0.10445900 |
|---|------------|-------------|-------------|

|    |             |             |             |
|----|-------------|-------------|-------------|
| H  | 2.10292500  | -3.57450100 | -0.15360800 |
| C  | 4.25682400  | -3.30934500 | -0.09146600 |
| H  | 4.46624700  | -4.37237400 | -0.13255500 |
| C  | 5.30152200  | -2.34506200 | -0.02356500 |
| H  | 6.34096600  | -2.65733400 | -0.01312600 |
| C  | 4.97546000  | -1.01587000 | 0.02629400  |
| H  | 5.74674500  | -0.26148600 | 0.07568900  |
| C  | 3.60094900  | -0.59436800 | 0.00989300  |
| C  | 3.10465400  | 0.71092900  | 0.04333500  |
| C  | 3.90442600  | 1.91211800  | 0.11945600  |
| C  | 3.37155200  | 3.16298900  | 0.10034600  |
| H  | 4.00656900  | 4.03964900  | 0.15279600  |
| C  | 1.95882200  | 3.28903200  | 0.00926600  |
| C  | 1.11566600  | 2.19195200  | -0.04341300 |
| H  | 0.05362600  | 2.38948500  | -0.11200800 |
| C  | 1.62219700  | 0.88837400  | -0.01580600 |
| C  | -1.81123200 | 1.06801100  | 1.51265200  |
| C  | -0.88709500 | 1.05768400  | 2.56359900  |
| H  | 0.03540900  | 0.49566900  | 2.46937800  |
| C  | -1.18230800 | 1.78385000  | 3.71934500  |
| H  | -0.48632800 | 1.79163900  | 4.55364600  |
| C  | -2.37781500 | 2.49481100  | 3.78090800  |
| H  | -2.64757000 | 3.07501700  | 4.65813800  |
| C  | -3.23583500 | 2.44340300  | 2.67922800  |
| H  | -4.18104300 | 2.98316900  | 2.68725700  |
| C  | -2.92624700 | -1.13689900 | 0.06403600  |
| C  | -3.26922000 | -1.72885500 | 1.28797500  |
| H  | -2.70903300 | -1.49053100 | 2.18700600  |
| C  | -4.32565800 | -2.63421700 | 1.35898200  |
| H  | -4.58307200 | -3.08575600 | 2.31315800  |
| C  | -5.04558100 | -2.96416000 | 0.20846400  |
| H  | -5.86840800 | -3.67176400 | 0.26482900  |
| C  | -4.70151900 | -2.38624100 | -1.01343000 |
| H  | -5.25287400 | -2.64221400 | -1.91408100 |
| C  | -3.64593600 | -1.47598600 | -1.08813300 |
| H  | -3.38720600 | -1.03428500 | -2.04456400 |
| C  | -1.89035300 | 1.09658200  | -1.47724100 |
| C  | -3.02733300 | 1.92234600  | -1.53281200 |
| H  | -3.68544900 | 1.98479700  | -0.67422200 |
| C  | -3.29393300 | 2.66572800  | -2.68242300 |
| H  | -4.17020300 | 3.30779100  | -2.71373000 |
| C  | -2.44604300 | 2.58373300  | -3.78994100 |
| H  | -2.66130600 | 3.16233100  | -4.68446500 |
| C  | -1.32451600 | 1.75494100  | -3.74607300 |
| H  | -0.66266100 | 1.68260300  | -4.60463700 |
| C  | -1.04486700 | 1.01578700  | -2.59512400 |
| H  | -0.16784400 | 0.37675900  | -2.55791300 |
| N  | 2.58642100  | -1.58766500 | -0.05650500 |
| N  | -2.97040400 | 1.74258400  | 1.57368700  |
| Pt | 0.63739500  | -0.84552900 | -0.05862300 |
| Cl | -0.30420000 | -3.10225000 | -0.17483000 |
| P  | -1.51457000 | 0.03921900  | -0.01656600 |
| F  | 1.45009400  | 4.53681000  | -0.01801000 |
| F  | 5.25299100  | 1.80361300  | 0.21096200  |

Complex 1a, ground state, CH2Cl2 solution

|    |             |             |             |
|----|-------------|-------------|-------------|
| C  | 2.93123400  | -2.88860300 | -0.10365600 |
| H  | 2.08716300  | -3.56816800 | -0.14589500 |
| C  | 4.25045300  | -3.32470200 | -0.09682000 |
| H  | 4.46601100  | -4.38694500 | -0.13611500 |
| C  | 5.26284200  | -2.36860900 | -0.03877300 |
| H  | 6.30752300  | -2.66726400 | -0.03102900 |
| C  | 4.93191200  | -1.01889900 | 0.00906900  |
| H  | 5.70457100  | -0.26710500 | 0.05338300  |
| C  | 3.58294000  | -0.62919000 | -0.00156900 |
| C  | 3.06428600  | 0.74088400  | 0.03720300  |
| C  | 3.86619500  | 1.89110600  | 0.08985600  |
| C  | 3.35457300  | 3.17845600  | 0.11523400  |
| H  | 4.00798400  | 4.04096200  | 0.15550300  |
| C  | 1.97232800  | 3.29845400  | 0.08220600  |
| C  | 1.12403900  | 2.19864600  | 0.03073700  |
| H  | 0.06116700  | 2.39901200  | -0.00310100 |
| C  | 1.64147200  | 0.89688400  | 0.01059800  |
| C  | -1.81013700 | 1.01609800  | 1.53486300  |
| C  | -0.89451100 | 0.96069300  | 2.59197100  |
| H  | 0.02181700  | 0.39051700  | 2.48504300  |
| C  | -1.19127100 | 1.65144700  | 3.76867600  |
| H  | -0.50226800 | 1.62424200  | 4.60832700  |
| C  | -2.37963000 | 2.37321900  | 3.84397300  |
| H  | -2.65038400 | 2.92714000  | 4.73774500  |
| C  | -3.22888700 | 2.36827800  | 2.73436600  |
| H  | -4.16795300 | 2.91841000  | 2.75284400  |
| C  | -2.93681600 | -1.11916800 | -0.00967100 |
| C  | -3.30628000 | -1.75413400 | 1.18467800  |
| H  | -2.75317900 | -1.56318200 | 2.09917100  |
| C  | -4.37889400 | -2.64264100 | 1.20540900  |
| H  | -4.65666000 | -3.12790600 | 2.13705800  |
| C  | -5.08824000 | -2.91398600 | 0.03312200  |
| H  | -5.92355000 | -3.60893500 | 0.05024000  |
| C  | -4.71744100 | -2.29415800 | -1.15996600 |
| H  | -5.26046900 | -2.50431200 | -2.07741200 |
| C  | -3.64599800 | -1.39962700 | -1.18387400 |
| H  | -3.36748500 | -0.92387800 | -2.11818600 |
| C  | -1.83823700 | 1.14507200  | -1.45506900 |
| C  | -2.95071700 | 2.00378400  | -1.49751300 |
| H  | -3.61597400 | 2.05991000  | -0.64381000 |
| C  | -3.18425600 | 2.78682600  | -2.62798900 |
| H  | -4.04153200 | 3.45443700  | -2.64933400 |
| C  | -2.32764800 | 2.71186800  | -3.72919500 |
| H  | -2.51706600 | 3.32160000  | -4.60876900 |
| C  | -1.23020500 | 1.85065700  | -3.69832200 |
| H  | -0.56153100 | 1.78448800  | -4.55209900 |
| C  | -0.98314000 | 1.07214400  | -2.56614900 |
| H  | -0.12435700 | 0.40820000  | -2.53703600 |
| N  | 2.61092200  | -1.58480600 | -0.05719300 |
| N  | -2.96213900 | 1.70155900  | 1.60811500  |
| Pt | 0.62322500  | -0.85502600 | -0.05411500 |
| Cl | -0.31265600 | -3.11903700 | -0.14587300 |

|   |             |            |             |
|---|-------------|------------|-------------|
| P | -1.50576100 | 0.03654100 | -0.02324100 |
| F | 1.43594400  | 4.53495000 | 0.10241700  |
| F | 5.21905100  | 1.78663200 | 0.11936700  |

56

Complex 1b, ground state, gas phase

|    |             |             |             |
|----|-------------|-------------|-------------|
| Pt | -0.62300400 | -0.86277100 | -0.00552500 |
| Cl | 0.31175500  | -3.13318400 | 0.03539500  |
| P  | 1.51199700  | 0.03358200  | 0.00674300  |
| N  | -2.60446000 | -1.60874000 | 0.00219400  |
| C  | 1.70916500  | 1.27544600  | 1.35785900  |
| C  | 2.48701000  | 2.43541000  | 1.23249500  |
| H  | 2.98090500  | 2.66492600  | 0.29421300  |
| C  | 2.61687500  | 3.31655900  | 2.30808300  |
| H  | 3.21348600  | 4.21760000  | 2.19449900  |
| C  | 1.98105600  | 3.04467200  | 3.52035900  |
| H  | 2.08321100  | 3.73239000  | 4.35544700  |
| C  | 1.20589500  | 1.89048500  | 3.65388100  |
| H  | 0.70179900  | 1.67593400  | 4.59213200  |
| C  | 1.06310400  | 1.01439400  | 2.57774900  |
| H  | 0.43995000  | 0.12958500  | 2.67491900  |
| C  | 2.93810000  | -1.10709000 | 0.26724700  |
| C  | 3.68561700  | -1.10010300 | 1.45140800  |
| H  | 3.43065700  | -0.42058700 | 2.25715500  |
| C  | 4.77029800  | -1.96796900 | 1.60525800  |
| H  | 5.34148700  | -1.95224200 | 2.52957900  |
| C  | 5.11811400  | -2.84464300 | 0.57905500  |
| H  | 5.96262400  | -3.51804700 | 0.69914100  |
| C  | 4.37392200  | -2.85797500 | -0.60394000 |
| H  | 4.63198200  | -3.54597900 | -1.40417900 |
| C  | 3.28768000  | -2.00080400 | -0.75847800 |
| H  | 2.70443600  | -2.03441800 | -1.67248700 |
| C  | 1.97507000  | 0.86964500  | -1.57125200 |
| C  | 3.31202800  | 1.21695200  | -1.83752500 |
| H  | 4.08904500  | 0.97853100  | -1.11757500 |
| C  | 3.65480000  | 1.84507900  | -3.03434300 |
| H  | 4.69134600  | 2.10880500  | -3.22610500 |
| C  | 2.67145100  | 2.12092300  | -3.98787500 |
| H  | 2.94089300  | 2.60438100  | -4.92306900 |
| C  | 1.34627100  | 1.76173500  | -3.74134400 |
| H  | 0.57901900  | 1.95990300  | -4.48459700 |
| C  | 0.99807500  | 1.13797900  | -2.54118200 |
| H  | -0.03137300 | 0.85017000  | -2.35739000 |
| C  | -1.65910800 | 0.88192900  | -0.03628400 |
| C  | -3.08097900 | 0.71274700  | -0.03369400 |
| C  | -3.58617400 | -0.66171000 | -0.00966100 |
| C  | -2.91403400 | -2.91610800 | 0.02143500  |
| H  | -2.06488000 | -3.59001200 | 0.02999500  |
| C  | -4.22923700 | -3.36371200 | 0.03073500  |
| H  | -4.43424000 | -4.42865500 | 0.04638800  |
| C  | -5.25089700 | -2.41606600 | 0.02025900  |
| H  | -6.29299800 | -2.72360000 | 0.02771200  |
| C  | -4.93182300 | -1.06307500 | 0.00003000  |
| H  | -5.71119200 | -0.31713100 | -0.00845300 |
| C  | -3.89581700 | 1.85485700  | -0.05753700 |

|   |             |            |             |
|---|-------------|------------|-------------|
| C | -3.39916500 | 3.14782800 | -0.08804600 |
| H | -4.06249100 | 4.00346800 | -0.10603200 |
| C | -2.01817200 | 3.28092300 | -0.09319800 |
| C | -1.15801300 | 2.18954000 | -0.06770300 |
| H | -0.09778900 | 2.40152200 | -0.06562200 |
| F | -5.24793300 | 1.73671700 | -0.05296200 |
| F | -1.49393300 | 4.52262800 | -0.12545000 |

56

Complex 1b, excited state, gas phase

|    |             |             |             |
|----|-------------|-------------|-------------|
| Pt | 0.63660400  | -0.85515500 | -0.00174000 |
| Cl | -0.30457200 | -3.11874200 | -0.05889800 |
| P  | -1.52175200 | 0.03589500  | -0.00214600 |
| N  | 2.57854100  | -1.61263800 | -0.00289500 |
| C  | -1.74500900 | 1.25978500  | -1.36630100 |
| C  | -2.52036700 | 2.42160000  | -1.24204200 |
| H  | -2.99811700 | 2.66289700  | -0.29841000 |
| C  | -2.66879200 | 3.28931200  | -2.32623200 |
| H  | -3.26314400 | 4.19193900  | -2.21343300 |
| C  | -2.05455300 | 3.00194700  | -3.54596900 |
| H  | -2.17125300 | 3.67909400  | -4.38775000 |
| C  | -1.28220800 | 1.84571700  | -3.67859100 |
| H  | -0.79501400 | 1.61888600  | -4.62285100 |
| C  | -1.12038900 | 0.98332900  | -2.59412900 |
| H  | -0.49906300 | 0.09734700  | -2.69192700 |
| C  | -2.93660600 | -1.12444200 | -0.23333000 |
| C  | -3.69087300 | -1.14718900 | -1.41286000 |
| H  | -3.44819800 | -0.47966600 | -2.23230600 |
| C  | -4.76674500 | -2.02960600 | -1.54421900 |
| H  | -5.34341900 | -2.03703500 | -2.46520300 |
| C  | -5.09891300 | -2.89116600 | -0.50021200 |
| H  | -5.93655500 | -3.57586800 | -0.60298100 |
| C  | -4.34795200 | -2.87455800 | 0.67848600  |
| H  | -4.59401300 | -3.55027400 | 1.49283800  |
| C  | -3.27062000 | -2.00262200 | 0.81081000  |
| H  | -2.68273500 | -2.01209600 | 1.72259200  |
| C  | -1.98401100 | 0.89028100  | 1.56742500  |
| C  | -3.32412400 | 1.22435400  | 1.83578300  |
| H  | -4.10164900 | 0.96618800  | 1.12326600  |
| C  | -3.66900500 | 1.86534600  | 3.02509000  |
| H  | -4.70795100 | 2.11829100  | 3.21836100  |
| C  | -2.68452200 | 2.16813500  | 3.96928900  |
| H  | -2.95554200 | 2.66141000  | 4.89887200  |
| C  | -1.35605100 | 1.82322000  | 3.72055900  |
| H  | -0.58751900 | 2.04248400  | 4.45654900  |
| C  | -1.00591200 | 1.18617900  | 2.52787500  |
| H  | 0.02659300  | 0.91002300  | 2.34293700  |
| C  | 1.63842800  | 0.87203000  | 0.02387200  |
| C  | 3.12101300  | 0.68120100  | 0.04098700  |
| C  | 3.60393800  | -0.62843600 | 0.02113000  |
| C  | 2.91166400  | -2.90439800 | -0.02542400 |
| H  | 2.07825500  | -3.59759100 | -0.04346700 |
| C  | 4.23378600  | -3.35009700 | -0.02596800 |
| H  | 4.43207200  | -4.41591300 | -0.04412800 |
| C  | 5.28862500  | -2.39507500 | -0.00220200 |

|   |            |             |             |
|---|------------|-------------|-------------|
| H | 6.32521900 | -2.71681400 | -0.00289800 |
| C | 4.97493300 | -1.06249500 | 0.02075600  |
| H | 5.75332200 | -0.31425100 | 0.03814700  |
| C | 3.93615200 | 1.87463500  | 0.07489600  |
| C | 3.41680400 | 3.13095500  | 0.08283800  |
| H | 4.06237100 | 4.00107400  | 0.10700500  |
| C | 2.00317400 | 3.26988800  | 0.05690800  |
| C | 1.14767200 | 2.18131700  | 0.02906100  |
| H | 0.08708400 | 2.39151400  | 0.00481000  |
| F | 5.28646700 | 1.75265900  | 0.10069500  |
| F | 1.50477100 | 4.52224900  | 0.06149600  |

56

Complex 1b, ground state, CH2Cl2 solution

|    |             |             |             |
|----|-------------|-------------|-------------|
| Pt | 0.62127800  | -0.86321200 | -0.00622700 |
| Cl | -0.32293200 | -3.17324700 | -0.09621300 |
| P  | -1.51734000 | 0.05585700  | 0.00457100  |
| N  | 2.61243400  | -1.60337800 | 0.00964300  |
| C  | -1.74304200 | 1.21299700  | -1.41433800 |
| C  | -2.49072600 | 2.39736700  | -1.33594200 |
| H  | -2.94574500 | 2.70111100  | -0.39975700 |
| C  | -2.64164200 | 3.21075800  | -2.46168400 |
| H  | -3.21579800 | 4.12965600  | -2.38484900 |
| C  | -2.05748100 | 2.84761500  | -3.67663900 |
| H  | -2.17760100 | 3.48198300  | -4.55022400 |
| C  | -1.31156600 | 1.66925900  | -3.76348300 |
| H  | -0.84874800 | 1.38253600  | -4.70340700 |
| C  | -1.14765600 | 0.86066100  | -2.63812200 |
| H  | -0.54882000 | -0.04356400 | -2.70526500 |
| C  | -2.94159300 | -1.10829500 | -0.14985800 |
| C  | -3.62838000 | -1.27865000 | -1.35915900 |
| H  | -3.33989600 | -0.71395400 | -2.23906500 |
| C  | -4.69806100 | -2.17482100 | -1.44234500 |
| H  | -5.22358200 | -2.29437600 | -2.38561200 |
| C  | -5.09215200 | -2.90503300 | -0.32088600 |
| H  | -5.92620400 | -3.59814100 | -0.38606400 |
| C  | -4.40999100 | -2.74027100 | 0.88861400  |
| H  | -4.70945100 | -3.30599700 | 1.76637500  |
| C  | -3.33980000 | -1.85172200 | 0.97370900  |
| H  | -2.81590400 | -1.73743800 | 1.91760000  |
| C  | -1.92979700 | 0.96327500  | 1.55372100  |
| C  | -3.24464700 | 1.39991300  | 1.80253400  |
| H  | -4.03378800 | 1.19856400  | 1.08479900  |
| C  | -3.55332500 | 2.07544800  | 2.98294100  |
| H  | -4.57130400 | 2.41059300  | 3.15946900  |
| C  | -2.55989200 | 2.30872600  | 3.93835900  |
| H  | -2.80359300 | 2.82996900  | 4.85978900  |
| C  | -1.25855300 | 1.85881000  | 3.71100900  |
| H  | -0.48527800 | 2.02325100  | 4.45587200  |
| C  | -0.94374800 | 1.18863700  | 2.52621800  |
| H  | 0.06726200  | 0.83347600  | 2.35814800  |
| C  | 1.64683000  | 0.88232700  | 0.01548400  |
| C  | 3.06868100  | 0.72295900  | 0.03820500  |
| C  | 3.58662100  | -0.64820700 | 0.04200400  |
| C  | 2.93871700  | -2.90781800 | 0.00859600  |



|   |            |             |             |
|---|------------|-------------|-------------|
| H | 2.10279000 | -3.59567700 | -0.01869100 |
| C | 4.25725100 | -3.34364200 | 0.03940800  |
| H | 4.47303300 | -4.40615000 | 0.03710100  |
| C | 5.26933600 | -2.38609000 | 0.07340000  |
| H | 6.31348400 | -2.68280800 | 0.09927200  |
| C | 4.93491100 | -1.03593200 | 0.07448000  |
| H | 5.70862200 | -0.28477200 | 0.10138200  |
| C | 3.87239900 | 1.87367100  | 0.04862500  |
| C | 3.36458500 | 3.16328000  | 0.03833300  |
| H | 4.02056700 | 4.02484800  | 0.04612500  |
| C | 1.98345700 | 3.28277300  | 0.01422900  |
| C | 1.13169600 | 2.18426600  | 0.00226000  |
| H | 0.07022800 | 2.38685600  | -0.02293600 |
| F | 5.22374200 | 1.76706600  | 0.06820800  |
| F | 1.44496700 | 4.52049100  | 0.00258700  |

55

Complex 2a, ground state, gas phase

|   |             |             |             |
|---|-------------|-------------|-------------|
| C | -3.43573600 | -2.31018800 | 0.10618000  |
| H | -2.69391500 | -3.09980100 | 0.15987700  |
| C | -4.80349000 | -2.55672400 | 0.09445300  |
| H | -5.16629500 | -3.57778400 | 0.14118100  |
| C | -5.67537300 | -1.46975900 | 0.02202200  |
| H | -6.75112800 | -1.62232400 | 0.01019600  |
| C | -5.15493100 | -0.18240000 | -0.03446400 |
| H | -5.81989100 | 0.67133200  | -0.08993900 |
| C | -3.76680000 | 0.01379000  | -0.01858800 |
| C | -3.08308700 | 1.30912900  | -0.06585900 |
| C | -3.78612200 | 2.52307000  | -0.13031900 |
| H | -4.87243600 | 2.52811200  | -0.15416000 |
| C | -3.10521500 | 3.73486900  | -0.16191600 |
| H | -3.65503300 | 4.67056600  | -0.21103800 |
| C | -1.70958400 | 3.72879200  | -0.12479100 |
| H | -1.16097400 | 4.66770000  | -0.14249600 |
| C | -1.00704200 | 2.52316800  | -0.06219600 |
| H | 0.07520900  | 2.57427900  | -0.02651400 |
| C | -1.65894100 | 1.27976900  | -0.03467500 |
| C | 1.78216200  | 0.96213300  | -1.53470000 |
| C | 0.86749600  | 1.03504100  | -2.59165200 |
| H | -0.11743800 | 0.59372800  | -2.48581200 |
| C | 1.25435400  | 1.68535500  | -3.76514200 |
| H | 0.56782900  | 1.75490800  | -4.60442700 |
| C | 2.52892400  | 2.24161600  | -3.83781600 |
| H | 2.87187400  | 2.75794600  | -4.72939800 |
| C | 3.36938600  | 2.11796100  | -2.72847200 |
| H | 4.37388300  | 2.53724200  | -2.74493700 |
| C | 2.61658700  | -1.30429000 | 0.00889600  |
| C | 2.93211800  | -1.95801400 | -1.19051800 |
| H | 2.43780700  | -1.67451000 | -2.11462500 |
| C | 3.87574000  | -2.98296200 | -1.20567600 |
| H | 4.11258200  | -3.48128700 | -2.14179200 |
| C | 4.50842800  | -3.37207000 | -0.02302600 |
| H | 5.24300000  | -4.17288400 | -0.03584500 |
| C | 4.18997200  | -2.73285600 | 1.17514200  |
| H | 4.67292900  | -3.03389600 | 2.10085600  |

|    |             |             |             |
|----|-------------|-------------|-------------|
| C  | 3.24791200  | -1.70319900 | 1.19345900  |
| H  | 3.00784100  | -1.21493300 | 2.13206200  |
| C  | 1.82927900  | 1.08627900  | 1.44930100  |
| C  | 3.07034900  | 1.74481100  | 1.50632800  |
| H  | 3.75263800  | 1.67382700  | 0.66735400  |
| C  | 3.41058800  | 2.49577500  | 2.63132900  |
| H  | 4.36895000  | 3.00735400  | 2.66442300  |
| C  | 2.53072600  | 2.58635200  | 3.71311200  |
| H  | 2.80335000  | 3.16902500  | 4.58927600  |
| C  | 1.30341100  | 1.92430900  | 3.66747200  |
| H  | 0.61534900  | 1.98735100  | 4.50599200  |
| C  | 0.95130700  | 1.17907700  | 2.54042800  |
| H  | -0.00681200 | 0.66989900  | 2.49935200  |
| N  | -2.93721000 | -1.06362100 | 0.05074500  |
| N  | 3.01537900  | 1.48812100  | -1.60499500 |
| Pt | -0.86887300 | -0.58928600 | 0.05143200  |
| Cl | -0.24351600 | -2.96518000 | 0.17496200  |
| P  | 1.34738800  | 0.02813500  | 0.02095200  |

55

Complex 2a, excited state, gas phase

|   |             |             |             |
|---|-------------|-------------|-------------|
| C | 3.44334700  | -2.29429300 | -0.08701300 |
| H | 2.72132200  | -3.10085200 | -0.14912100 |
| C | 4.81426800  | -2.53553000 | -0.05773400 |
| H | 5.17460800  | -3.55731700 | -0.09834500 |
| C | 5.71106700  | -1.43385400 | 0.02606200  |
| H | 6.78415500  | -1.59730000 | 0.04928500  |
| C | 5.19613000  | -0.16449700 | 0.07378900  |
| H | 5.85744300  | 0.69316400  | 0.13329700  |
| C | 3.78229100  | 0.05337300  | 0.04076500  |
| C | 3.12992400  | 1.29003000  | 0.07268200  |
| C | 3.80740100  | 2.55581400  | 0.16263700  |
| H | 4.88951100  | 2.58436300  | 0.24312800  |
| C | 3.09848700  | 3.72360100  | 0.13675900  |
| H | 3.62333700  | 4.67398600  | 0.19730400  |
| C | 1.66820900  | 3.71948000  | 0.02533700  |
| H | 1.12819400  | 4.66085400  | -0.00509900 |
| C | 0.98371400  | 2.51281700  | -0.03875400 |
| H | -0.09646400 | 2.54964400  | -0.12245500 |
| C | 1.63867000  | 1.26964900  | -0.00284600 |
| C | -1.79170500 | 1.02974700  | 1.49764800  |
| C | -0.87723900 | 1.15883100  | 2.54923200  |
| H | 0.11384300  | 0.72782000  | 2.46307800  |
| C | -1.27122300 | 1.85324400  | 3.69495000  |
| H | -0.58454100 | 1.96633200  | 4.52933400  |
| C | -2.55236000 | 2.39617000  | 3.74641500  |
| H | -2.90070700 | 2.94538300  | 4.61593900  |
| C | -3.39251400 | 2.21460200  | 2.64481400  |
| H | -4.40235200 | 2.62108600  | 2.64502500  |
| C | -2.59756900 | -1.32428500 | 0.08383900  |
| C | -2.85945400 | -1.93577900 | 1.31813600  |
| H | -2.34062900 | -1.60627000 | 2.21323900  |
| C | -3.78137400 | -2.97668600 | 1.40543700  |
| H | -3.97667800 | -3.44211900 | 2.36767200  |
| C | -4.44627600 | -3.42299200 | 0.26118300  |

|    |             |             |             |
|----|-------------|-------------|-------------|
| H  | -5.16398600 | -4.23606200 | 0.33022500  |
| C  | -4.18192300 | -2.82489900 | -0.97084100 |
| H  | -4.69028300 | -3.17050500 | -1.86685900 |
| C  | -3.26108500 | -1.77993000 | -1.06189300 |
| H  | -3.06250700 | -1.32475200 | -2.02635300 |
| C  | -1.87748200 | 1.00924200  | -1.48950100 |
| C  | -3.13089700 | 1.64314400  | -1.56107100 |
| H  | -3.80040600 | 1.60200400  | -0.71010200 |
| C  | -3.49921300 | 2.33229500  | -2.71628100 |
| H  | -4.46678300 | 2.82531300  | -2.76040900 |
| C  | -2.63565800 | 2.38511100  | -3.81361200 |
| H  | -2.93024000 | 2.91966400  | -4.71299300 |
| C  | -1.39658600 | 1.74675700  | -3.75347300 |
| H  | -0.72115400 | 1.77970500  | -4.60384200 |
| C  | -1.01652100 | 1.06304200  | -2.59688600 |
| H  | -0.04935700 | 0.57221600  | -2.54739200 |
| N  | 2.92226800  | -1.06326000 | -0.03964100 |
| N  | -3.03166800 | 1.54189500  | 1.54882900  |
| Pt | 0.89073500  | -0.57191700 | -0.05594500 |
| Cl | 0.25360100  | -2.93336000 | -0.21441800 |
| P  | -1.35704600 | 0.03030800  | -0.01858300 |

55

Complex 2a, ground state, CH2Cl2 solution

|   |             |             |             |
|---|-------------|-------------|-------------|
| C | 3.43573600  | -2.31018800 | -0.10618000 |
| H | 2.69391500  | -3.09980100 | -0.15987700 |
| C | 4.80349000  | -2.55672400 | -0.09445300 |
| H | 5.16629500  | -3.57778400 | -0.14118100 |
| C | 5.67537300  | -1.46975900 | -0.02202200 |
| H | 6.75112800  | -1.62232400 | -0.01019600 |
| C | 5.15493100  | -0.18240000 | 0.03446400  |
| H | 5.81989100  | 0.67133200  | 0.08993900  |
| C | 3.76680000  | 0.01379000  | 0.01858800  |
| C | 3.08308700  | 1.30912900  | 0.06585900  |
| C | 3.78612200  | 2.52307000  | 0.13031900  |
| H | 4.87243600  | 2.52811200  | 0.15416000  |
| C | 3.10521500  | 3.73486900  | 0.16191600  |
| H | 3.65503300  | 4.67056600  | 0.21103800  |
| C | 1.70958400  | 3.72879200  | 0.12479100  |
| H | 1.16097400  | 4.66770000  | 0.14249600  |
| C | 1.00704200  | 2.52316800  | 0.06219600  |
| H | -0.07520900 | 2.57427900  | 0.02651400  |
| C | 1.65894100  | 1.27976900  | 0.03467500  |
| C | -1.78216200 | 0.96213300  | 1.53470000  |
| C | -0.86749600 | 1.03504100  | 2.59165200  |
| H | 0.11743800  | 0.59372800  | 2.48581200  |
| C | -1.25435400 | 1.68535500  | 3.76514200  |
| H | -0.56782900 | 1.75490800  | 4.60442700  |
| C | -2.52892400 | 2.24161600  | 3.83781600  |
| H | -2.87187400 | 2.75794600  | 4.72939800  |
| C | -3.36938600 | 2.11796100  | 2.72847200  |
| H | -4.37388300 | 2.53724200  | 2.74493700  |
| C | -2.61658700 | -1.30429000 | -0.00889600 |
| C | -2.93211800 | -1.95801400 | 1.19051800  |
| H | -2.43780700 | -1.67451000 | 2.11462500  |

|    |             |             |             |
|----|-------------|-------------|-------------|
| C  | -3.87574000 | -2.98296200 | 1.20567600  |
| H  | -4.11258200 | -3.48128700 | 2.14179200  |
| C  | -4.50842800 | -3.37207000 | 0.02302600  |
| H  | -5.24300000 | -4.17288400 | 0.03584500  |
| C  | -4.18997200 | -2.73285600 | -1.17514200 |
| H  | -4.67292900 | -3.03389600 | -2.10085600 |
| C  | -3.24791200 | -1.70319900 | -1.19345900 |
| H  | -3.00784100 | -1.21493300 | -2.13206200 |
| C  | -1.82927900 | 1.08627900  | -1.44930100 |
| C  | -3.07034900 | 1.74481100  | -1.50632800 |
| H  | -3.75263800 | 1.67382700  | -0.66735400 |
| C  | -3.41058800 | 2.49577500  | -2.63132900 |
| H  | -4.36895000 | 3.00735400  | -2.66442300 |
| C  | -2.53072600 | 2.58635200  | -3.71311200 |
| H  | -2.80335000 | 3.16902500  | -4.58927600 |
| C  | -1.30341100 | 1.92430900  | -3.66747200 |
| H  | -0.61534900 | 1.98735100  | -4.50599200 |
| C  | -0.95130700 | 1.17907700  | -2.54042800 |
| H  | 0.00681200  | 0.66989900  | -2.49935200 |
| N  | 2.93721000  | -1.06362100 | -0.05074500 |
| N  | -3.01537900 | 1.48812100  | 1.60499500  |
| Pt | 0.86887300  | -0.58928600 | -0.05143200 |
| Cl | 0.24351600  | -2.96518000 | -0.17496200 |
| P  | -1.34738800 | 0.02813500  | -0.02095200 |
