# Supplementary material for: The impact of cyclometalated and phosphine ligands on the luminescence properties of cycloplatinated(ii) complexes: photophysical and theoretical investigations
Source: Royal Society of Chemistry journal article supplement (doi:10.1039/d1nj04242d), 2021-01-01
Supplement: d1nj04242d2.pdf [file d1nj04242d2.pdf]

## Electronic Supplementary Information

# The Impact of Cyclometalated and Phosphine ligands on the Luminescence Properties of Cycloplatinated(II) Complexes: Photophysical and Theoretical Investigations

Hamid R. Shahsavari,\* Sareh Paziresh

Department of Chemistry, Institute for Advanced Studies in Basic Sciences (IASBS), 444 Prof. Yousef Sobouti Blvd., Zanjan, 45137-66731, Iran; Tel: +98 243 315 3206; Fax: +98 243 315 3232; Email: [shahsavari@iasbs.ac.ir](mailto:shahsavari@iasbs.ac.ir) (H.R.S).

| Contents:                                                                                                   | Page |
|-------------------------------------------------------------------------------------------------------------|------|
| <b>Figure S1.</b> $^1\text{H}$ NMR spectrum of <b>A</b> in $\text{CDCl}_3$ .                                | S3   |
| <b>Figure S2.</b> $^{19}\text{F}\{^1\text{H}\}$ NMR spectrum of <b>A</b> in $\text{CDCl}_3$ .               | S3   |
| <b>Figure S3.</b> $^{195}\text{Pt}\{^1\text{H}\}$ NMR spectrum of <b>A</b> in $\text{CDCl}_3$ .             | S4   |
| <b>Figure S4.</b> $^1\text{H}$ NMR spectrum of <b>1a</b> in $\text{CDCl}_3$ .                               | S4   |
| <b>Figure S5.</b> $^{19}\text{F}\{^1\text{H}\}$ NMR spectrum of <b>1a</b> in $\text{CDCl}_3$ .              | S5   |
| <b>Figure S6.</b> $^{31}\text{P}\{^1\text{H}\}$ NMR spectrum of <b>1a</b> in $\text{CDCl}_3$ .              | S5   |
| <b>Figure S7.</b> $^{195}\text{Pt}\{^1\text{H}\}$ NMR spectrum of <b>1a</b> in $\text{CDCl}_3$ .            | S6   |
| <b>Figure S8.</b> $^1\text{H}$ NMR spectrum of <b>1b</b> in $\text{CDCl}_3$ .                               | S6   |
| <b>Figure S9.</b> $^{19}\text{F}\{^1\text{H}\}$ NMR spectrum of <b>1b</b> in $\text{CDCl}_3$ .              | S7   |
| <b>Figure S10.</b> $^{31}\text{P}\{^1\text{H}\}$ NMR spectrum of <b>1b</b> in $\text{CDCl}_3$ .             | S7   |
| <b>Figure S11.</b> $^{195}\text{Pt}\{^1\text{H}\}$ NMR spectrum of <b>1b</b> in $\text{CDCl}_3$ .           | S8   |
| <b>Figure S12.</b> HR ESI-Mass spectrum of <b>A</b> . Inset shows the calculated pattern.                   | S8   |
| <b>Figure S13.</b> HR ESI-Mass spectrum of <b>1a</b> . Inset shows the calculated pattern.                  | S9   |
| <b>Figure S14.</b> HR ESI-Mass spectrum of <b>1b</b> . Inset shows the calculated pattern.                  | S9   |
| <b>Figure S15.</b> Molecular structure of <b>A</b> .                                                        | S10  |
| <b>Figure S16.</b> Molecular structure of <b>1b</b> .                                                       | S10  |
| <b>Figure S17.</b> View of the optimized structure of <b>A</b> in gas phase ( $S_0$ ) with atom numbering.  | S11  |
| <b>Figure S18.</b> View of the optimized structure of <b>1a</b> in gas phase ( $S_0$ ) with atom numbering. | S11  |
| <b>Figure S19.</b> View of the optimized structure of <b>1b</b> in gas phase ( $S_0$ ) with atom numbering. | S12  |

|                                                                                                                                                                                                            |     |
|------------------------------------------------------------------------------------------------------------------------------------------------------------------------------------------------------------|-----|
| <b>Figure S20.</b> View of the optimized structure of <b>2a</b> in gas phase ( $S_0$ ) with atom numbering.                                                                                                | S12 |
| <b>Table S1.</b> Selected bond distances ( $\text{\AA}$ ) and angles (deg) for the calculated ( $S_0$ and $T_1$ in gas phase and $S_0$ in $\text{CH}_2\text{Cl}_2$ ) structure of <b>A</b> .               | S13 |
| <b>Table S2.</b> Selected bond distances ( $\text{\AA}$ ) and angles (deg) for the calculated ( $S_0$ and $T_1$ in gas phase and $S_0$ in $\text{CH}_2\text{Cl}_2$ ) structure of <b>1a</b> .              | S13 |
| <b>Table S3.</b> Selected bond distances ( $\text{\AA}$ ) and angles (deg) for the calculated ( $S_0$ and $T_1$ in gas phase and $S_0$ in $\text{CH}_2\text{Cl}_2$ ) structure of <b>1b</b> .              | S14 |
| <b>Table S4.</b> Selected bond distances ( $\text{\AA}$ ) and angles (deg) for the calculated ( $S_0$ and $T_1$ in gas phase and $S_0$ in $\text{CH}_2\text{Cl}_2$ ) and crystal structures of <b>2a</b> . | S14 |
| <b>Figure S21.</b> Molecular orbital plots for the optimized structure of <b>A</b> in $\text{CH}_2\text{Cl}_2$ solution.                                                                                   | S15 |
| <b>Figure S22.</b> Molecular orbital plots for the optimized structure of <b>1a</b> in $\text{CH}_2\text{Cl}_2$ solution.                                                                                  | S16 |
| <b>Figure S23.</b> Molecular orbital plots for the optimized structure of <b>1b</b> in $\text{CH}_2\text{Cl}_2$ solution.                                                                                  | S17 |
| <b>Figure S24.</b> Molecular orbital plots for the optimized structure of <b>2a</b> in $\text{CH}_2\text{Cl}_2$ solution.                                                                                  | S18 |
| <b>Table S5.</b> The energies of the selected molecular orbitals of <b>A</b> with their compositions in $\text{CH}_2\text{Cl}_2$ .                                                                         | S19 |
| <b>Table S6.</b> The energies of the selected molecular orbitals of <b>1a</b> with their compositions in $\text{CH}_2\text{Cl}_2$ .                                                                        | S19 |
| <b>Table S7.</b> The energies of the selected molecular orbitals of <b>1b</b> with their compositions in $\text{CH}_2\text{Cl}_2$ .                                                                        | S20 |
| <b>Table S8.</b> The energies of the selected molecular orbitals of <b>2a</b> with their compositions in $\text{CH}_2\text{Cl}_2$ .                                                                        | S20 |
| <b>Figure S25.</b> The absorption spectra of <b>A</b> , <b>1a–b</b> and <b>2a</b> in $\text{CH}_2\text{Cl}_2$ at 298 K ( $10^{-5}$ M).                                                                     | S21 |
| <b>Table S9.</b> The absorption data of <b>A</b> , <b>1a–b</b> and <b>2a</b> in $\text{CH}_2\text{Cl}_2$ solutions ( $10^{-5}$ M).                                                                         | S21 |
| <b>Table S10.</b> Wavelengths and the nature of transitions for <b>A</b> where $M = \text{Pt}$ , $L = \text{dfppy}$ , $L' = \text{dmso}$ and $X = \text{Cl}$ .                                             | S22 |
| <b>Table S11.</b> Wavelengths and the nature of transitions for <b>1a</b> where $M = \text{Pt}$ , $L = \text{dfppy}$ , $L' = \text{PPh}_2\text{py}$ and $X = \text{Cl}$ .                                  | S22 |
| <b>Table S12.</b> Wavelengths and the nature of transitions for <b>1b</b> where $M = \text{Pt}$ , $L = \text{dfppy}$ , $L' = \text{PPh}_3$ and $X = \text{Cl}$ .                                           | S23 |
| <b>Table S13.</b> Wavelengths and the nature of transitions for <b>2a</b> where $M = \text{Pt}$ , $L = \text{ppy}$ , $L' = \text{PPh}_2\text{py}$ and $X = \text{Cl}$ .                                    | S23 |
| <b>Figure S26.</b> Frontier molecular orbital plots of <b>A</b> , <b>1a–b</b> and <b>2a</b> in $S_0$ and $T_1$ states and gas phase.                                                                       | S24 |
| <b>References</b>                                                                                                                                                                                          | S25 |

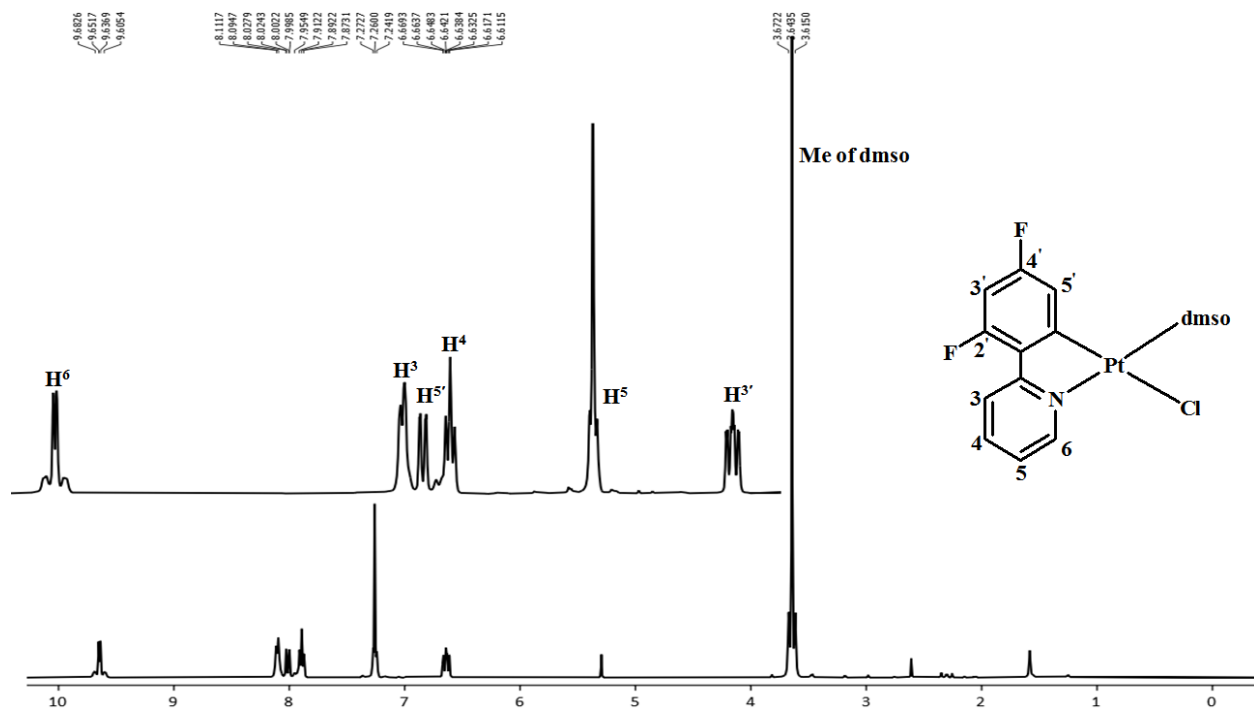

Figure S1. <sup>1</sup>H NMR spectrum of A in CDCl<sub>3</sub>.

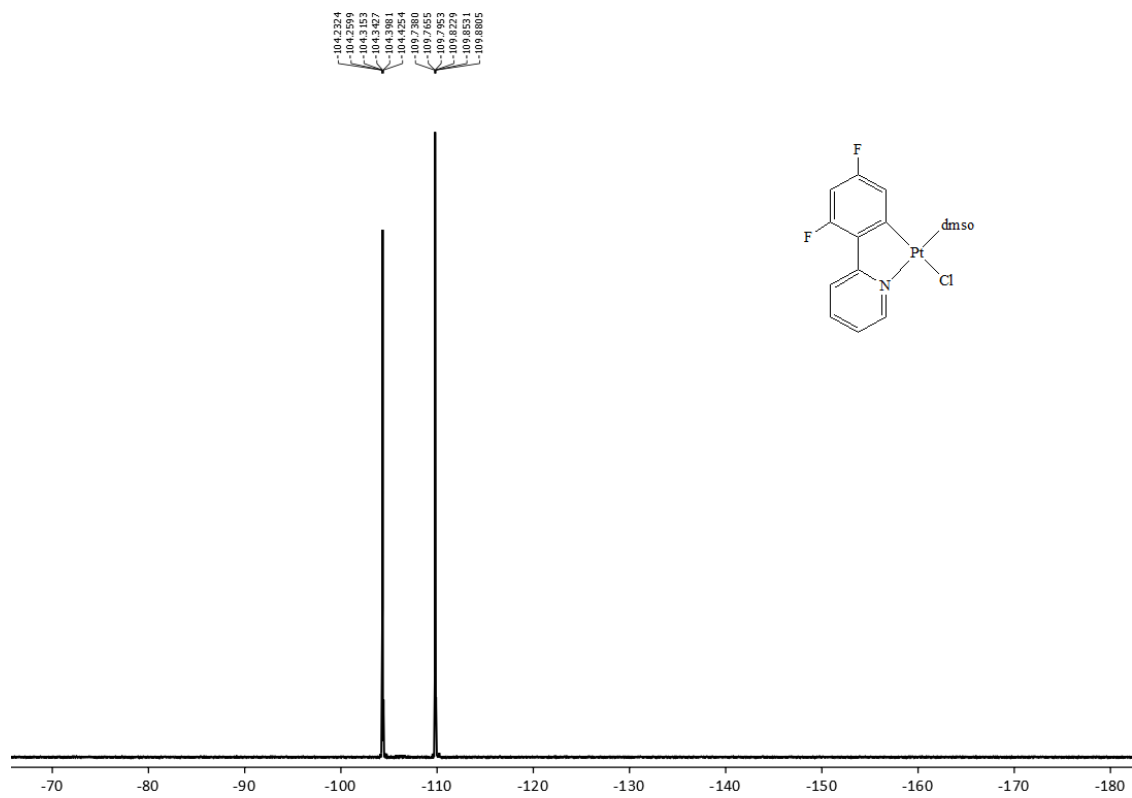

Figure S2. <sup>19</sup>F{<sup>1</sup>H} NMR spectrum of A in CDCl<sub>3</sub>.

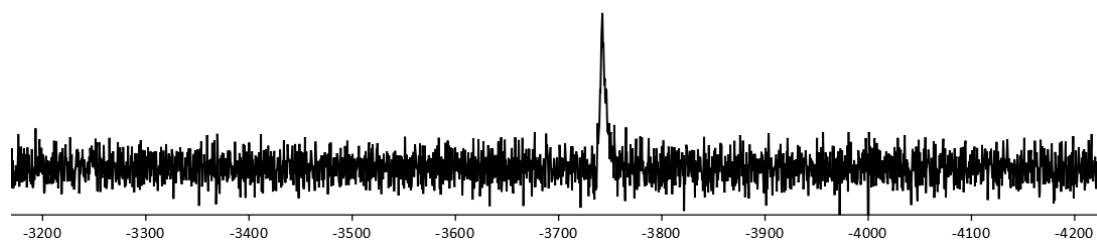

Figure S3.  $^{195}\text{Pt}\{^1\text{H}\}$  NMR spectrum of **A** in  $\text{CDCl}_3$ .

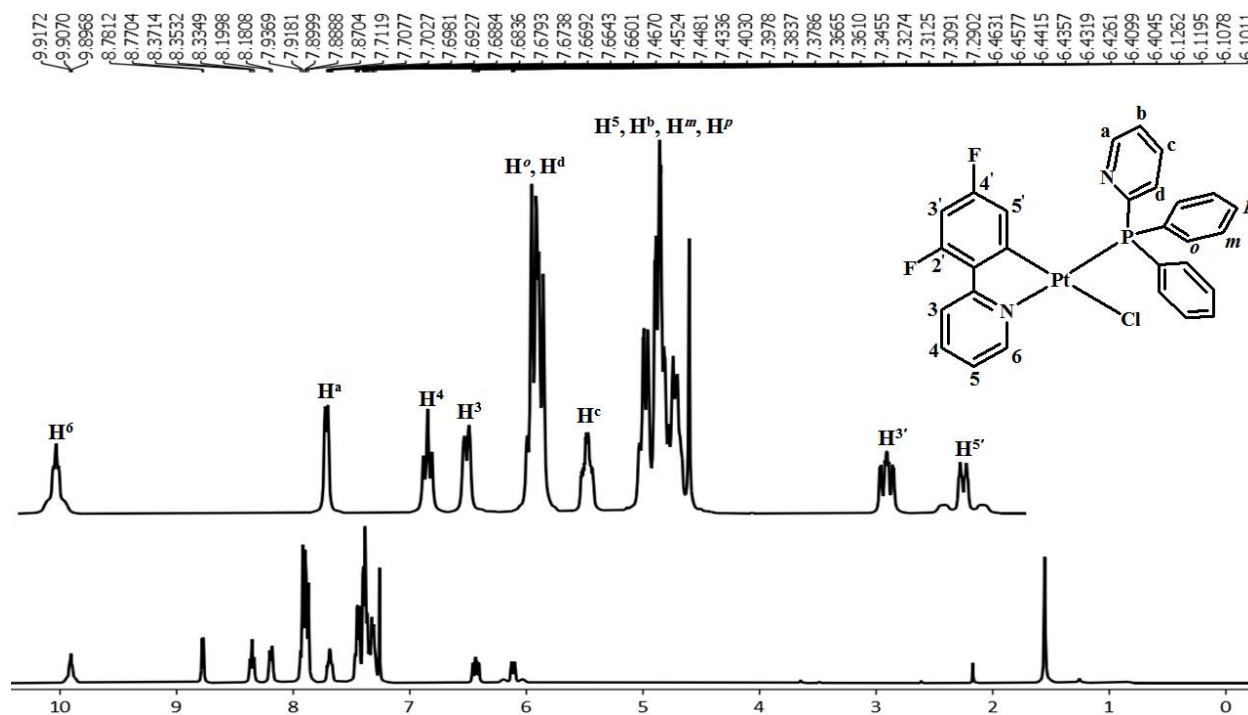

Figure S4.  $^1\text{H}$  NMR spectrum of **1a** in  $\text{CDCl}_3$ .

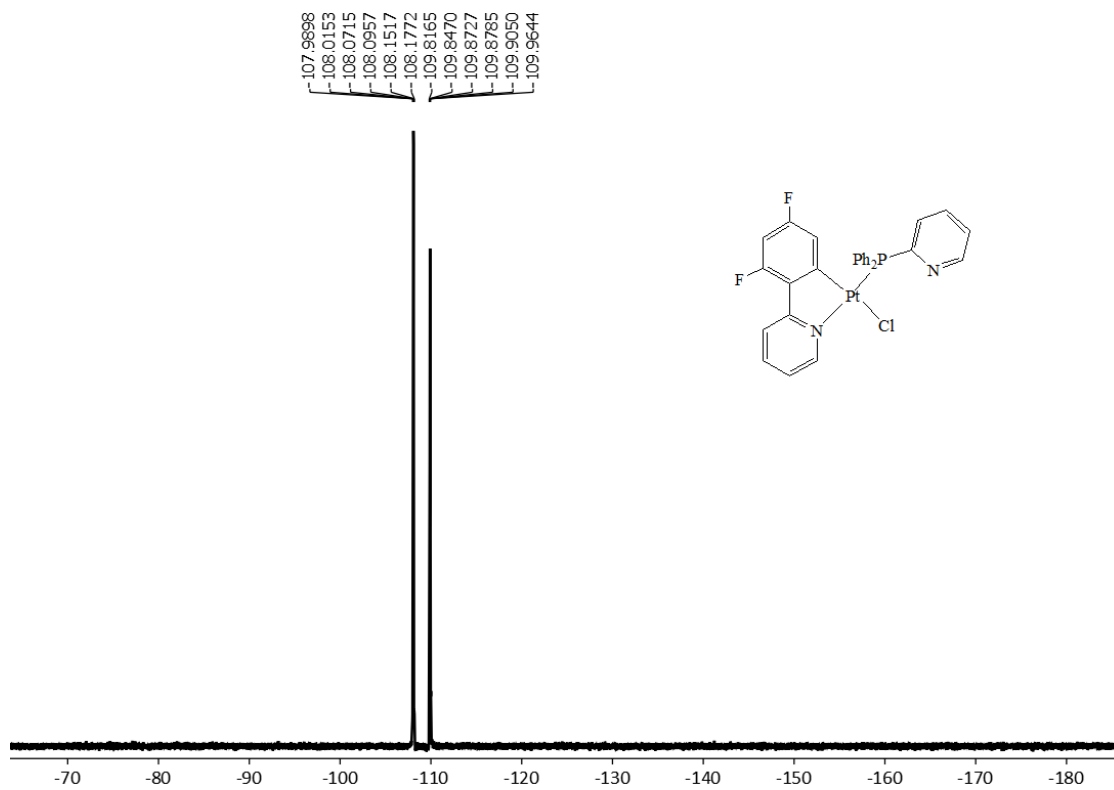

**Figure S5.**  $^{19}\text{F}\{^1\text{H}\}$  NMR spectrum of **1a** in  $\text{CDCl}_3$ .

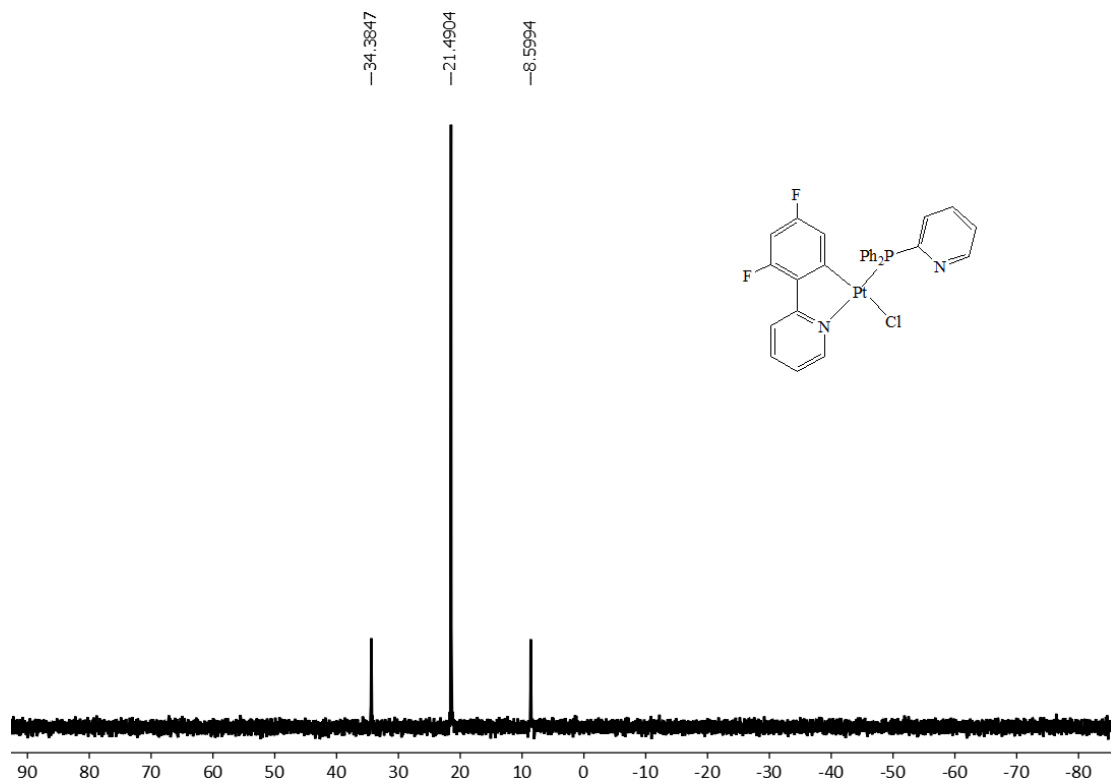

**Figure S6.**  $^{31}\text{P}\{^1\text{H}\}$  NMR spectrum of **1a** in  $\text{CDCl}_3$ .

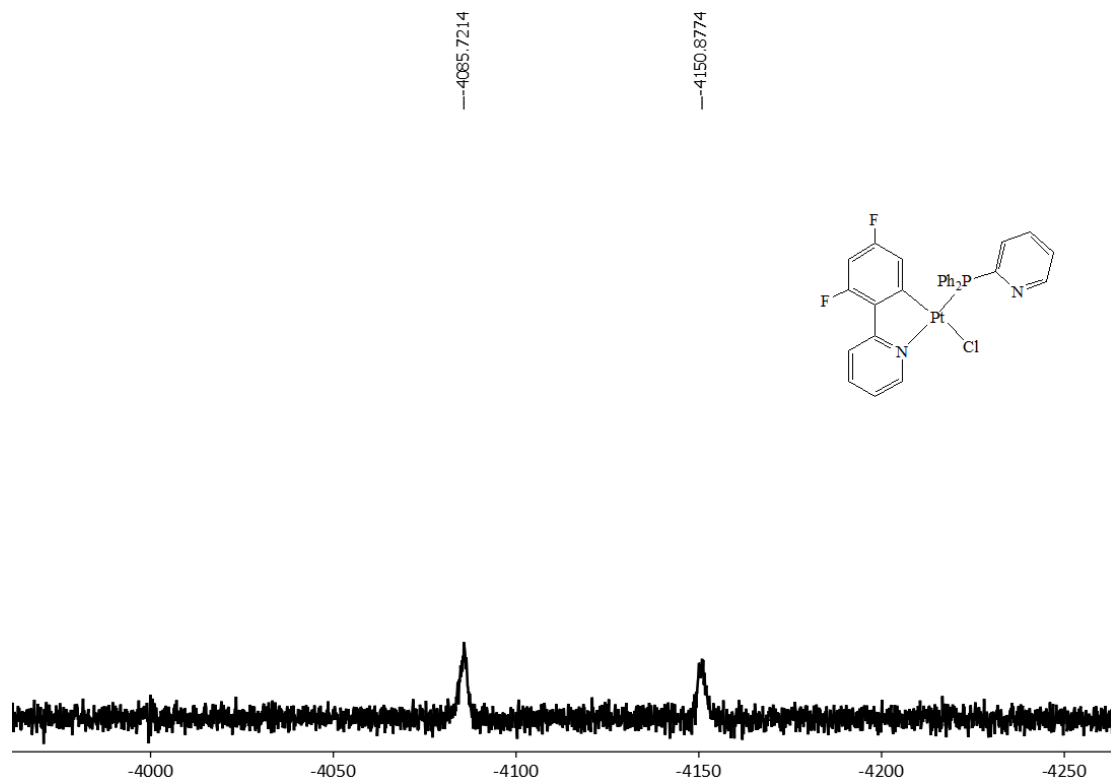

**Figure S7.**  $^{195}\text{Pt}\{^1\text{H}\}$  NMR spectrum of **1a** in  $\text{CDCl}_3$ .

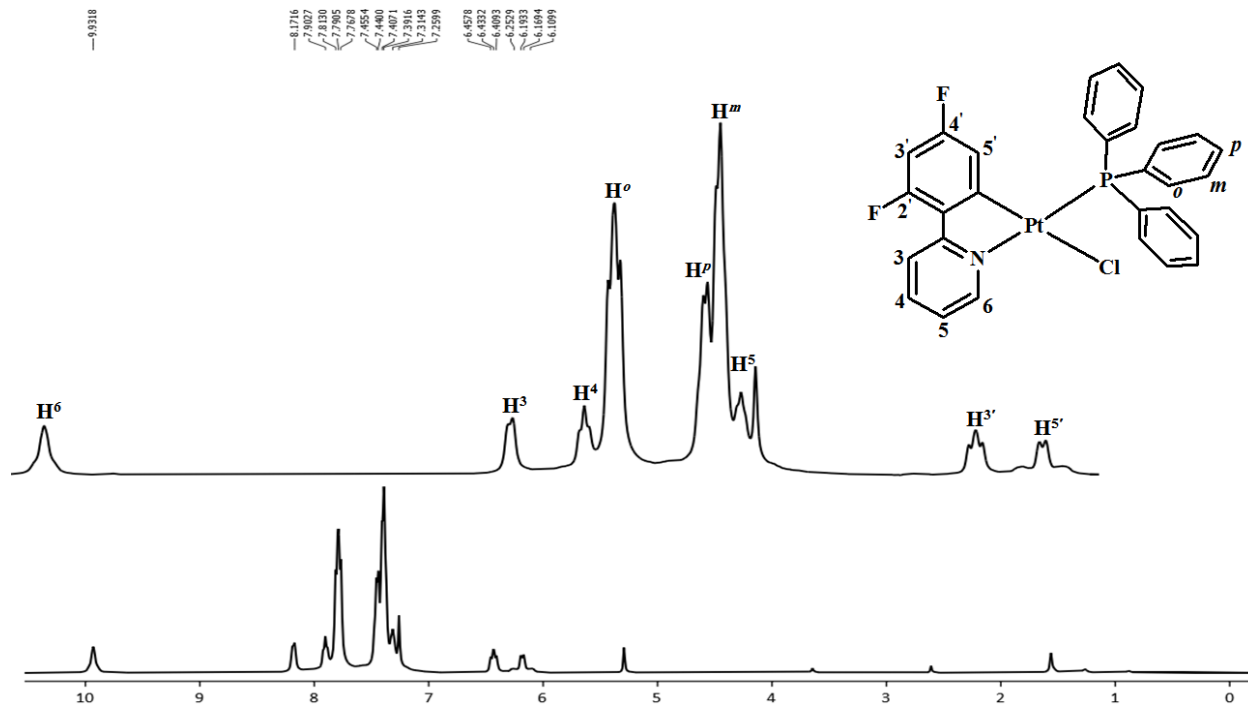

**Figure S8.**  $^1\text{H}$  NMR spectrum of **1b** in  $\text{CDCl}_3$ .

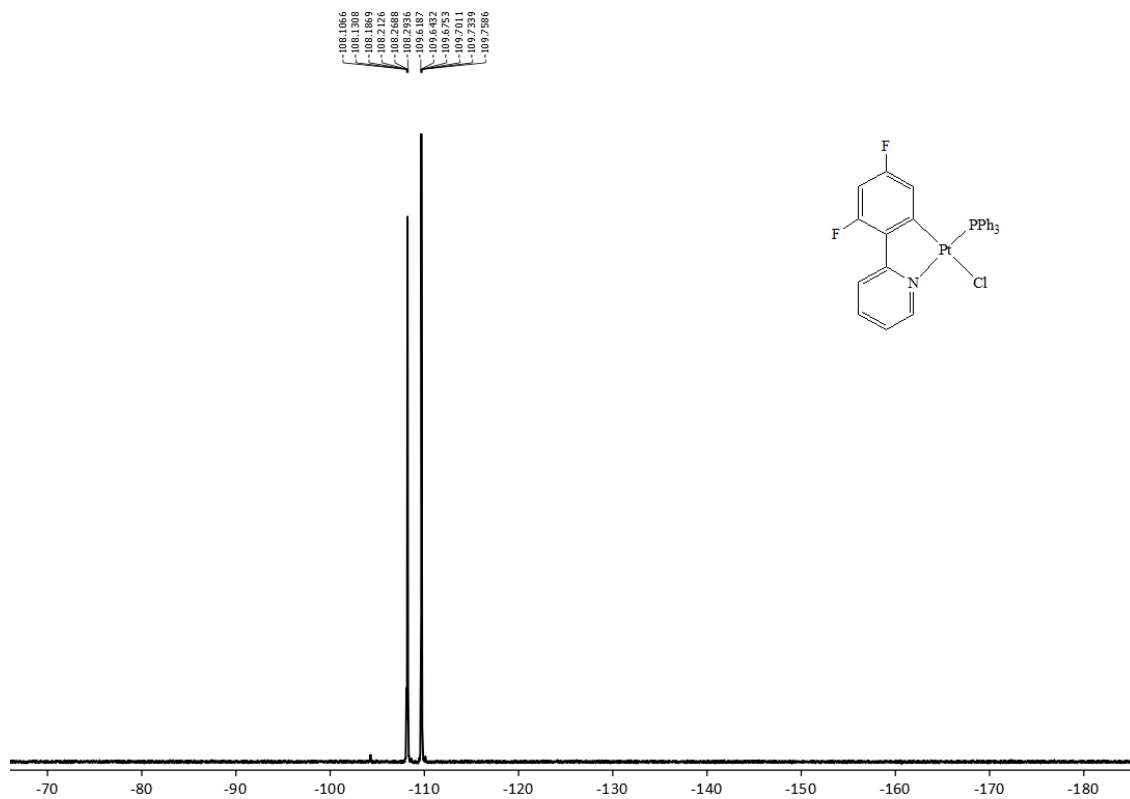

Figure S9.  $^{19}\text{F}\{^1\text{H}\}$  NMR spectrum of **1b** in  $\text{CDCl}_3$ .

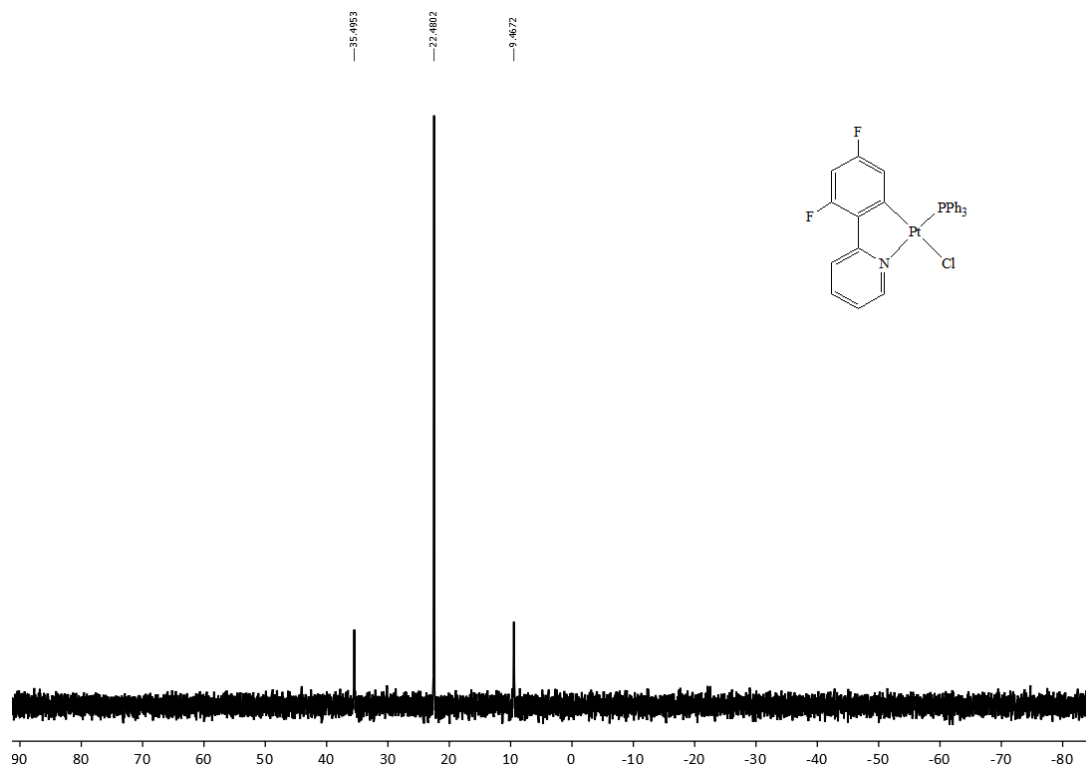

Figure S10.  $^{31}\text{P}\{^1\text{H}\}$  NMR spectrum of **1b** in  $\text{CDCl}_3$ .

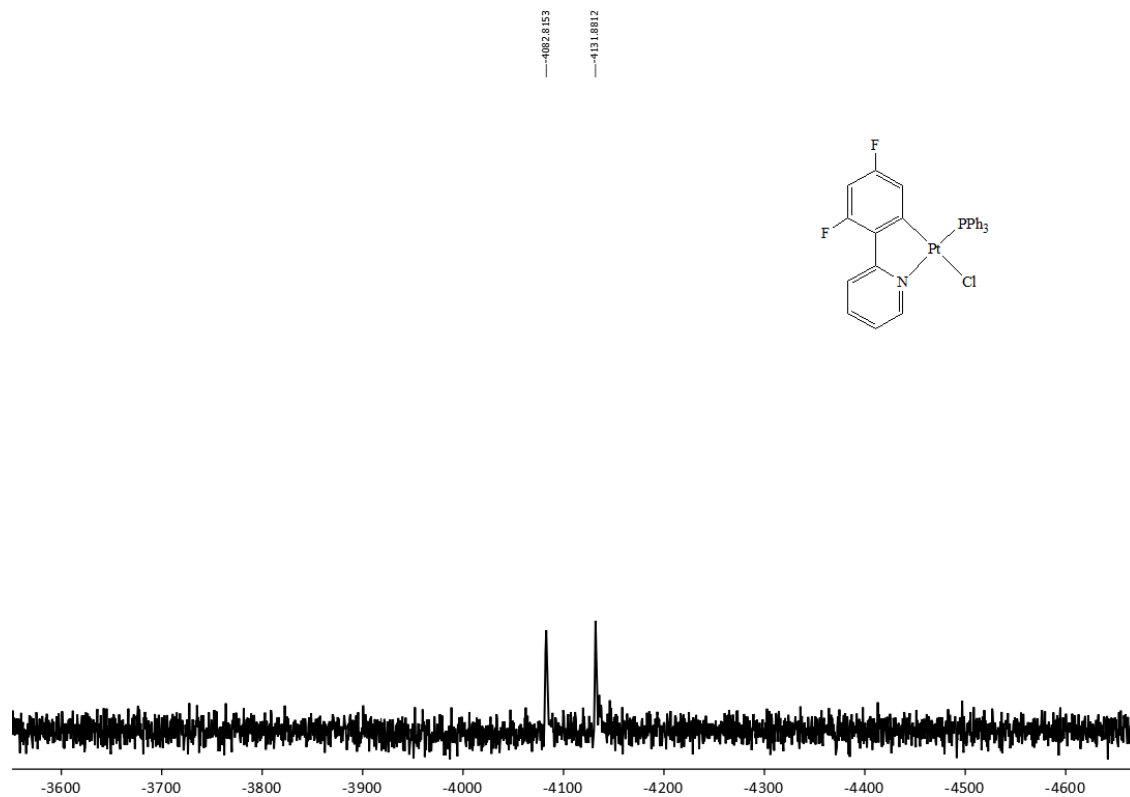

**Figure S11.**  $^{195}\text{Pt}\{^1\text{H}\}$  NMR spectrum of **1b** in  $\text{CDCl}_3$ .

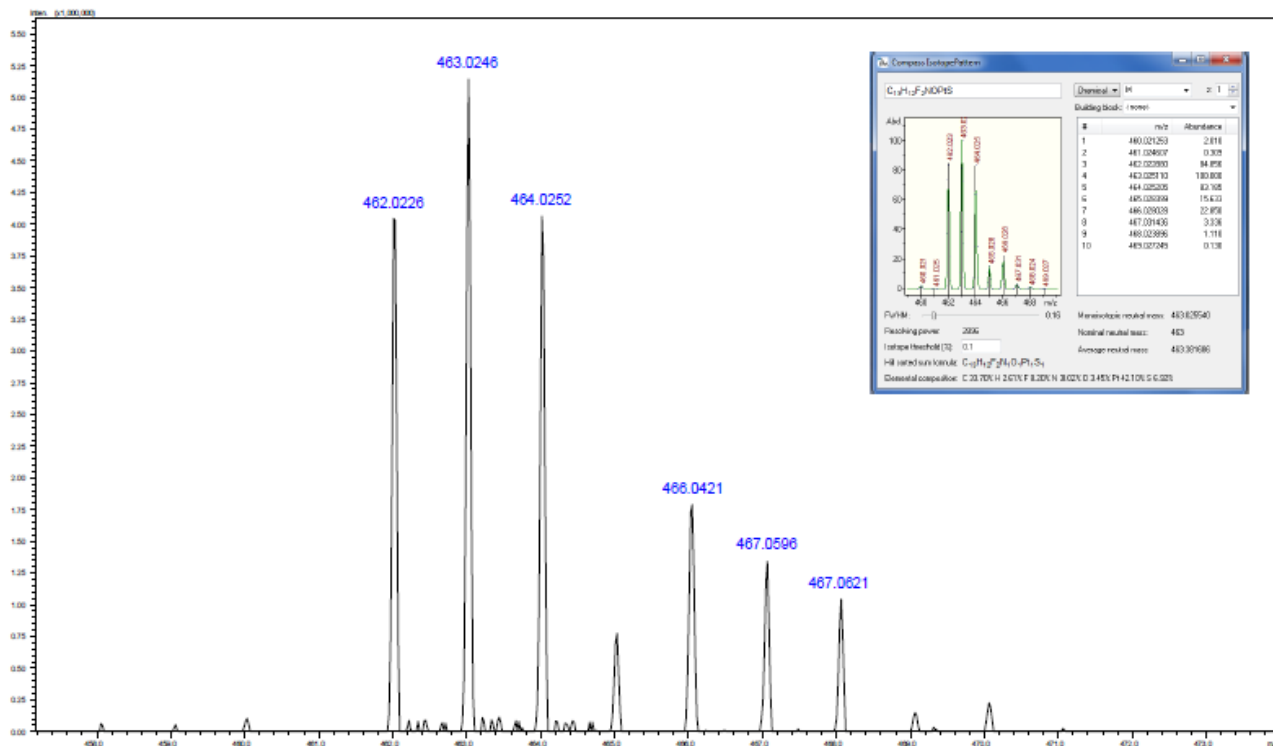

**Figure S12.** HR ESI-Mass spectrum of **A**. Inset shows the calculated pattern.



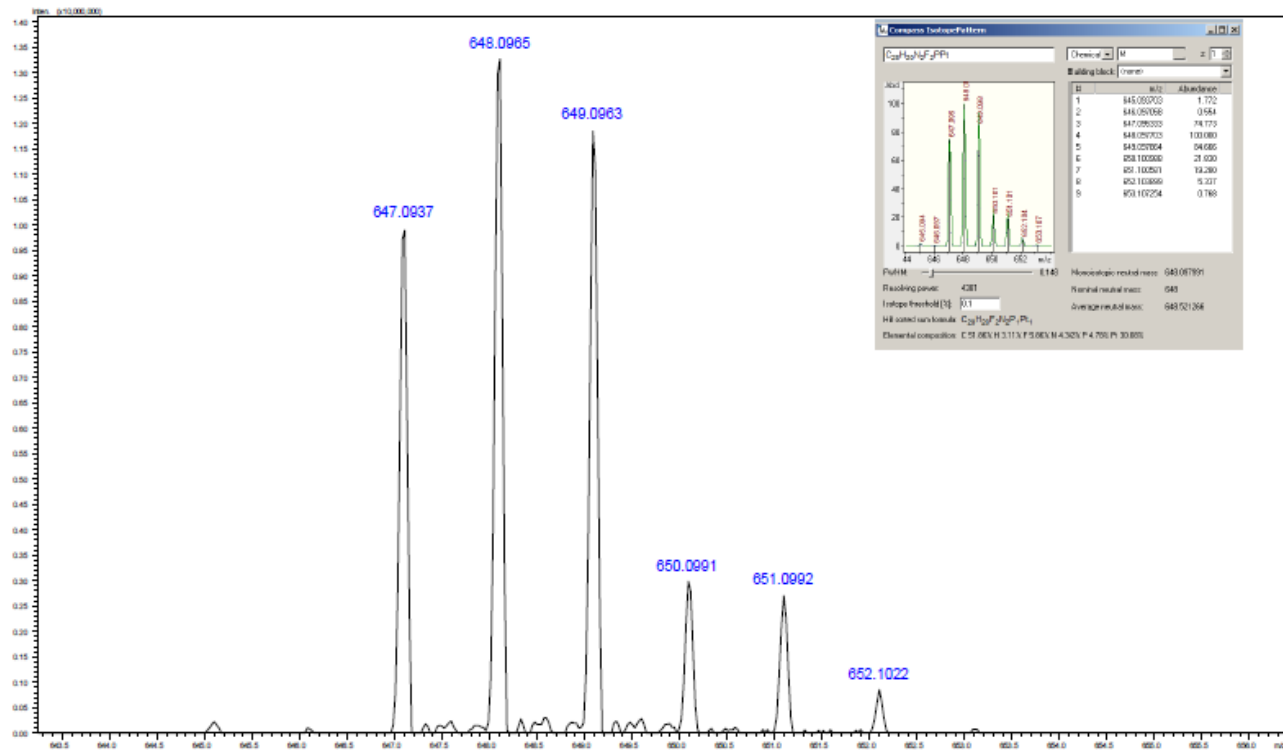

Figure S13. HR ESI-Mass spectrum of **1a**. Inset shows the calculated pattern.

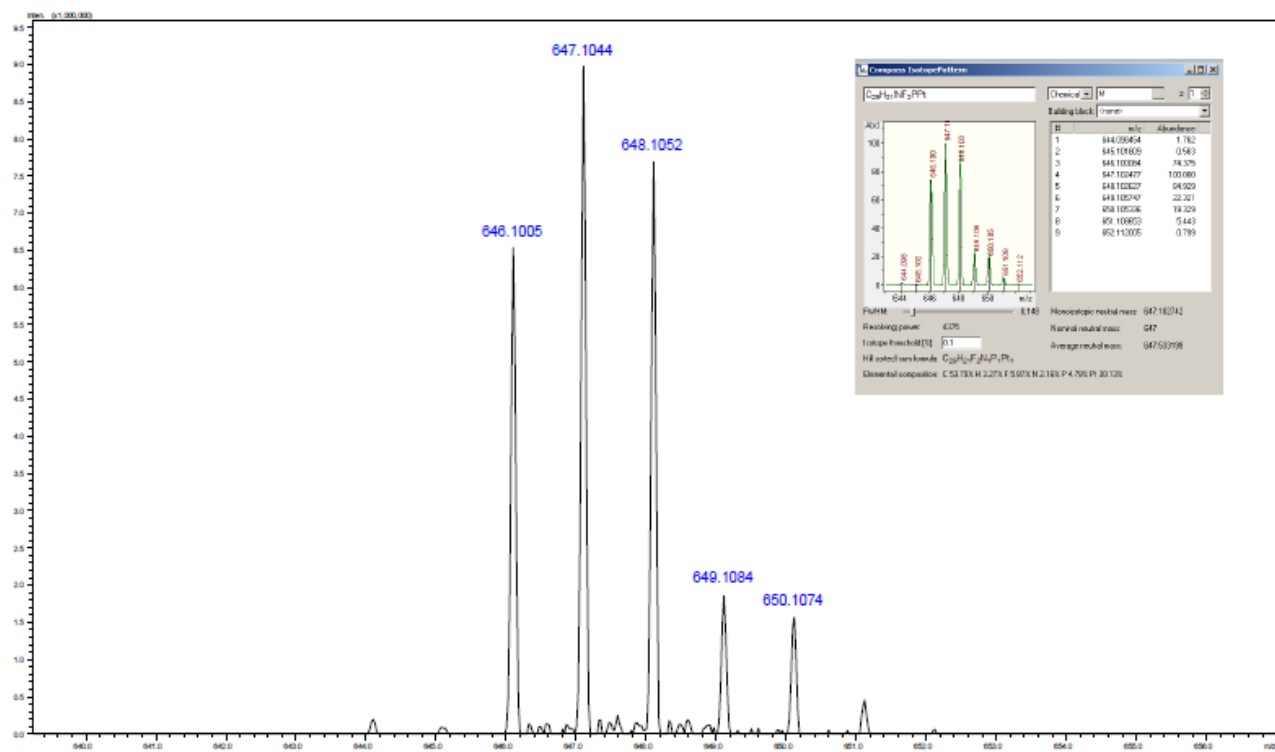

Figure S14. HR ESI-Mass spectrum of **1b**. Inset shows the calculated pattern.

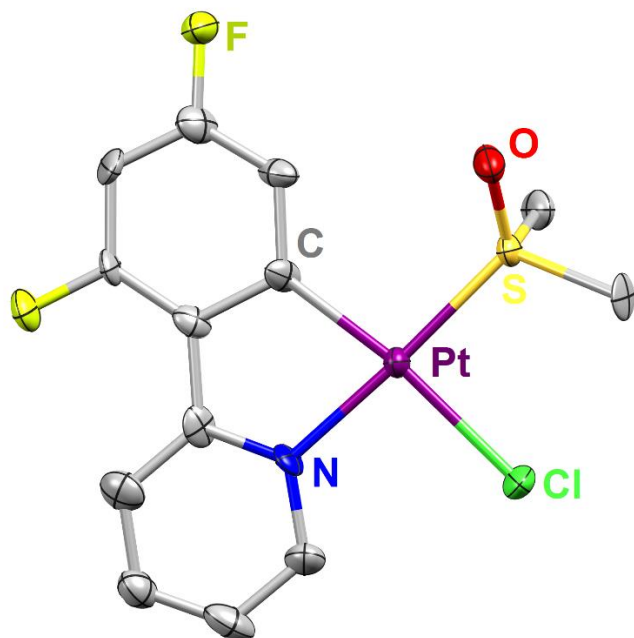

**Figure S15.** Molecular structure of **A**.

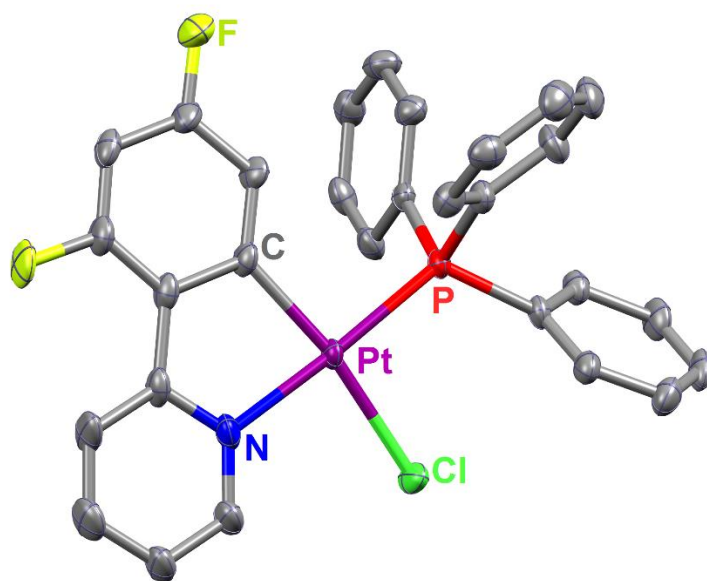

**Figure S16.** Molecular structure of **1b**.

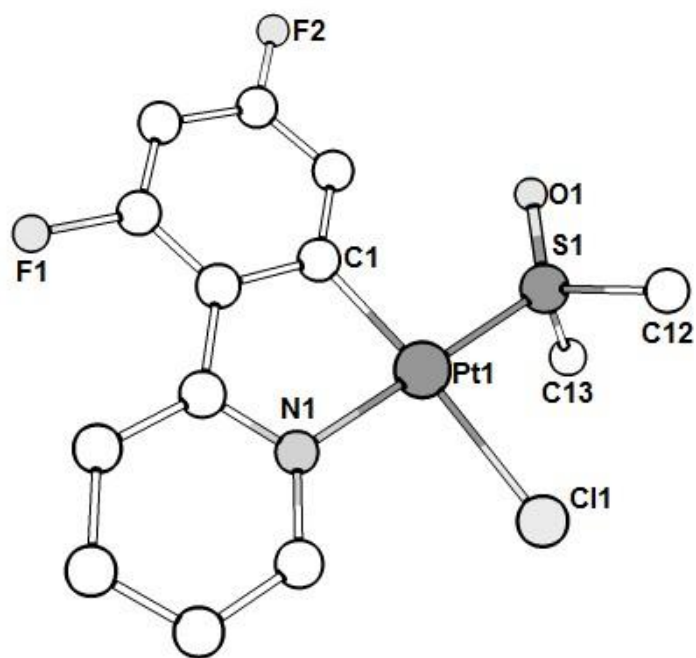

**Figure S17.** View of the optimized structure of **A** in gas phase ( $S_0$ ) with atom numbering.

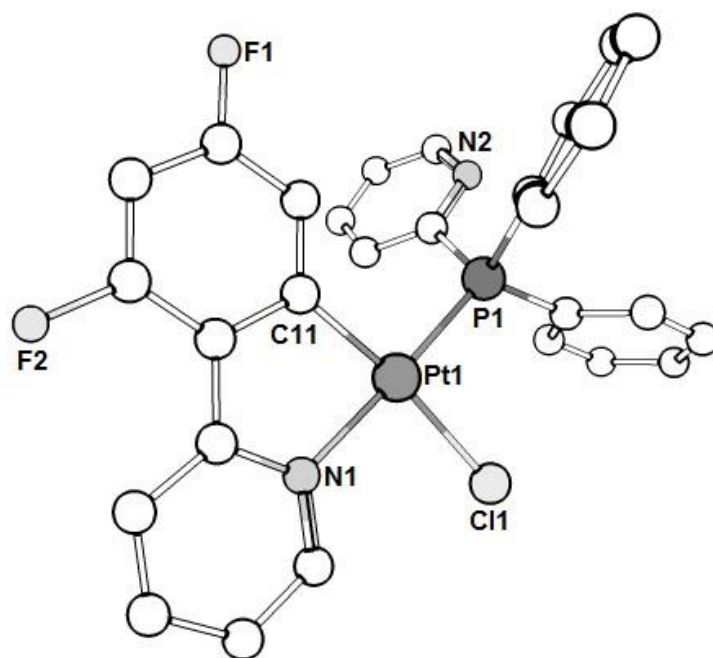

**Figure S18.** View of the optimized structure of **1a** in gas phase ( $S_0$ ) with atom numbering.

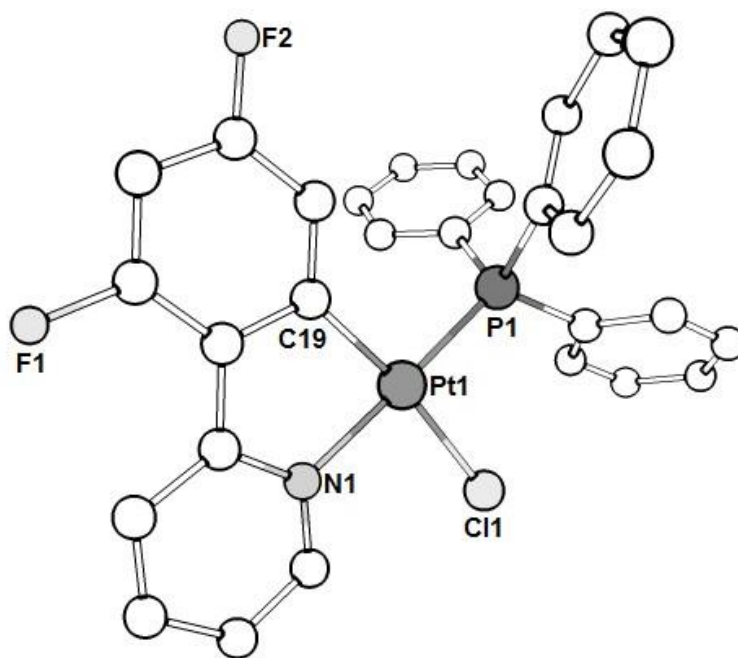

**Figure S19.** View of the optimized structure of **1b** in gas phase ( $S_0$ ) with atom numbering.

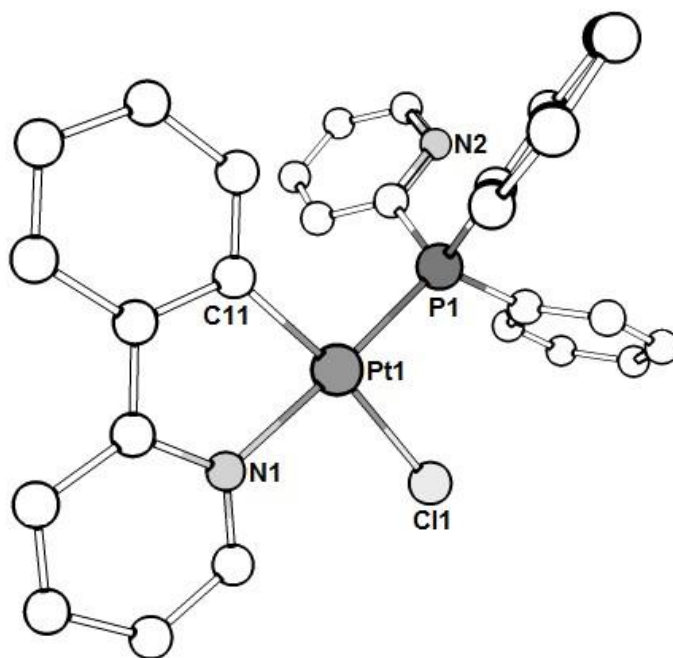

**Figure S20.** View of the optimized structure of **2a** in gas phase ( $S_0$ ) with atom numbering.

**Table S1.** Selected bond distances (Å) and angles (deg) for the calculated ( $S_0$  and  $T_1$  in gas phase and  $S_0$  in  $\text{CH}_2\text{Cl}_2$ ) structures of **A**.

| <b>Bond distance or angle</b> | <b><math>S_0</math> (gas phase)</b> | <b><math>T_1</math> (gas phase)</b> | <b><math>S_0</math> (<math>\text{CH}_2\text{Cl}_2</math>)</b> |
|-------------------------------|-------------------------------------|-------------------------------------|---------------------------------------------------------------|
| <b>Pt1-C1</b>                 | 2.01693                             | 1.98935                             | 2.01356                                                       |
| <b>Pt1-N1</b>                 | 2.06882                             | 2.03739                             | 2.07494                                                       |
| <b>Pt1-Cl1</b>                | 2.49854                             | 2.49441                             | 2.52530                                                       |
| <b>Pt1-S1</b>                 | 2.32693                             | 2.34311                             | 2.34527                                                       |
| <b>C1-Pt1-N1</b>              | 80.53958                            | 81.61921                            | 80.39857                                                      |
| <b>N1-Pt1-Cl1</b>             | 94.02501                            | 93.66922                            | 94.24241                                                      |
| <b>Cl1-Pt1-S1</b>             | 86.29798                            | 85.90180                            | 86.31952                                                      |
| <b>S1-Pt1-C1</b>              | 99.13743                            | 98.80977                            | 99.03949                                                      |

**Table S3.** Selected bond distances (Å) and angles (deg) for the calculated ( $S_0$  and  $T_1$  in gas phase and  $S_0$  in  $\text{CH}_2\text{Cl}_2$ ) structures of **1a**.

| <b>Bond distance or angle</b> | <b><math>S_0</math> (gas phase)</b> | <b><math>T_1</math> (gas phase)</b> | <b><math>S_0</math> (<math>\text{CH}_2\text{Cl}_2</math>)</b> |
|-------------------------------|-------------------------------------|-------------------------------------|---------------------------------------------------------------|
| <b>Pt1-C11</b>                | 2.02736                             | 1.99451                             | 2.02736                                                       |
| <b>Pt1-N1</b>                 | 2.11743                             | 2.08554                             | 2.11743                                                       |
| <b>Pt1-Cl1</b>                | 2.45154                             | 2.44804                             | 2.45154                                                       |
| <b>Pt1-P1</b>                 | 2.30834                             | 2.32712                             | 2.30834                                                       |
| <b>C11-Pt1-N1</b>             | 80.00244                            | 81.25104                            | 80.00244                                                      |
| <b>N1-Pt1-Cl1</b>             | 92.29351                            | 91.80313                            | 92.29351                                                      |
| <b>Cl1-Pt1-P1</b>             | 90.29233                            | 89.75095                            | 90.29233                                                      |
| <b>P1-Pt1-C11</b>             | 97.41417                            | 97.22065                            | 97.41417                                                      |

**Table S2.** Selected bond distances (Å°) and angles (deg) for the calculated (S<sub>0</sub> and T<sub>1</sub> in gas phase and S<sub>0</sub> in CH<sub>2</sub>Cl<sub>2</sub>) structures of **1b**.

| Bond distance or angle | S <sub>0</sub> (gas phase) | T <sub>1</sub> (gas phase) | S <sub>0</sub> (CH <sub>2</sub> Cl <sub>2</sub> ) |
|------------------------|----------------------------|----------------------------|---------------------------------------------------|
| <b>Pt1-C19</b>         | 2.02939                    | 1.99687                    | 2.02463                                           |
| <b>Pt1-N1</b>          | 2.11724                    | 2.08444                    | 2.12434                                           |
| <b>Pt1-Cl1</b>         | 2.31556                    | 2.45212                    | 2.49718                                           |
| <b>Pt1-P1</b>          | 2.31556                    | 2.33505                    | 2.32777                                           |
| <b>C19-Pt1-N1</b>      | 79.93027                   | 81.19505                   | 79.95225                                          |
| <b>N1-Pt1-Cl1</b>      | 91.74376                   | 91.26690                   | 91.85467                                          |
| <b>Cl1-Pt1-P1</b>      | 90.39175                   | 89.85544                   | 91.03254                                          |
| <b>P1-Pt1-C19</b>      | 97.93343                   | 97.68197                   | 97.17647                                          |

**Table S4.** Selected bond distances (Å°) and angles (deg) for the calculated (S<sub>0</sub> and T<sub>1</sub> in gas phase and S<sub>0</sub> in CH<sub>2</sub>Cl<sub>2</sub>) and crystal structures of **2a**.

| Bond distance or angle | S <sub>0</sub> (gas phase) | Crystal Structure | T <sub>1</sub> (gas phase) | S <sub>0</sub> (CH <sub>2</sub> Cl <sub>2</sub> ) |
|------------------------|----------------------------|-------------------|----------------------------|---------------------------------------------------|
| <b>Pt1-C11</b>         | 2.03101                    | 1.989             | 1.98836                    | 2.03101                                           |
| <b>Pt1-N1</b>          | 2.12203                    | 2.112             | 2.09017                    | 2.12203                                           |
| <b>Pt1-Cl1</b>         | 2.45992                    | 2.383             | 2.45101                    | 2.45992                                           |
| <b>Pt1-P1</b>          | 2.30086                    | 2.222             | 2.32736                    | 2.30086                                           |
| <b>C11-Pt1-N1</b>      | 80.01041                   | 80.98             | 81.48354                   | 80.01041                                          |
| <b>N1-Pt1-Cl1</b>      | 91.82854                   | 92.50             | 91.52863                   | 91.82854                                          |
| <b>Cl1-Pt1-P1</b>      | 90.85784                   | 92.13             | 89.95885                   | 90.85784                                          |
| <b>P1-Pt1-C11</b>      | 97.30739                   | 94.62             | 97.07743                   | 97.30739                                          |

The crystal structure of **2a** has been previously reported and brought here for comparison.<sup>1</sup>

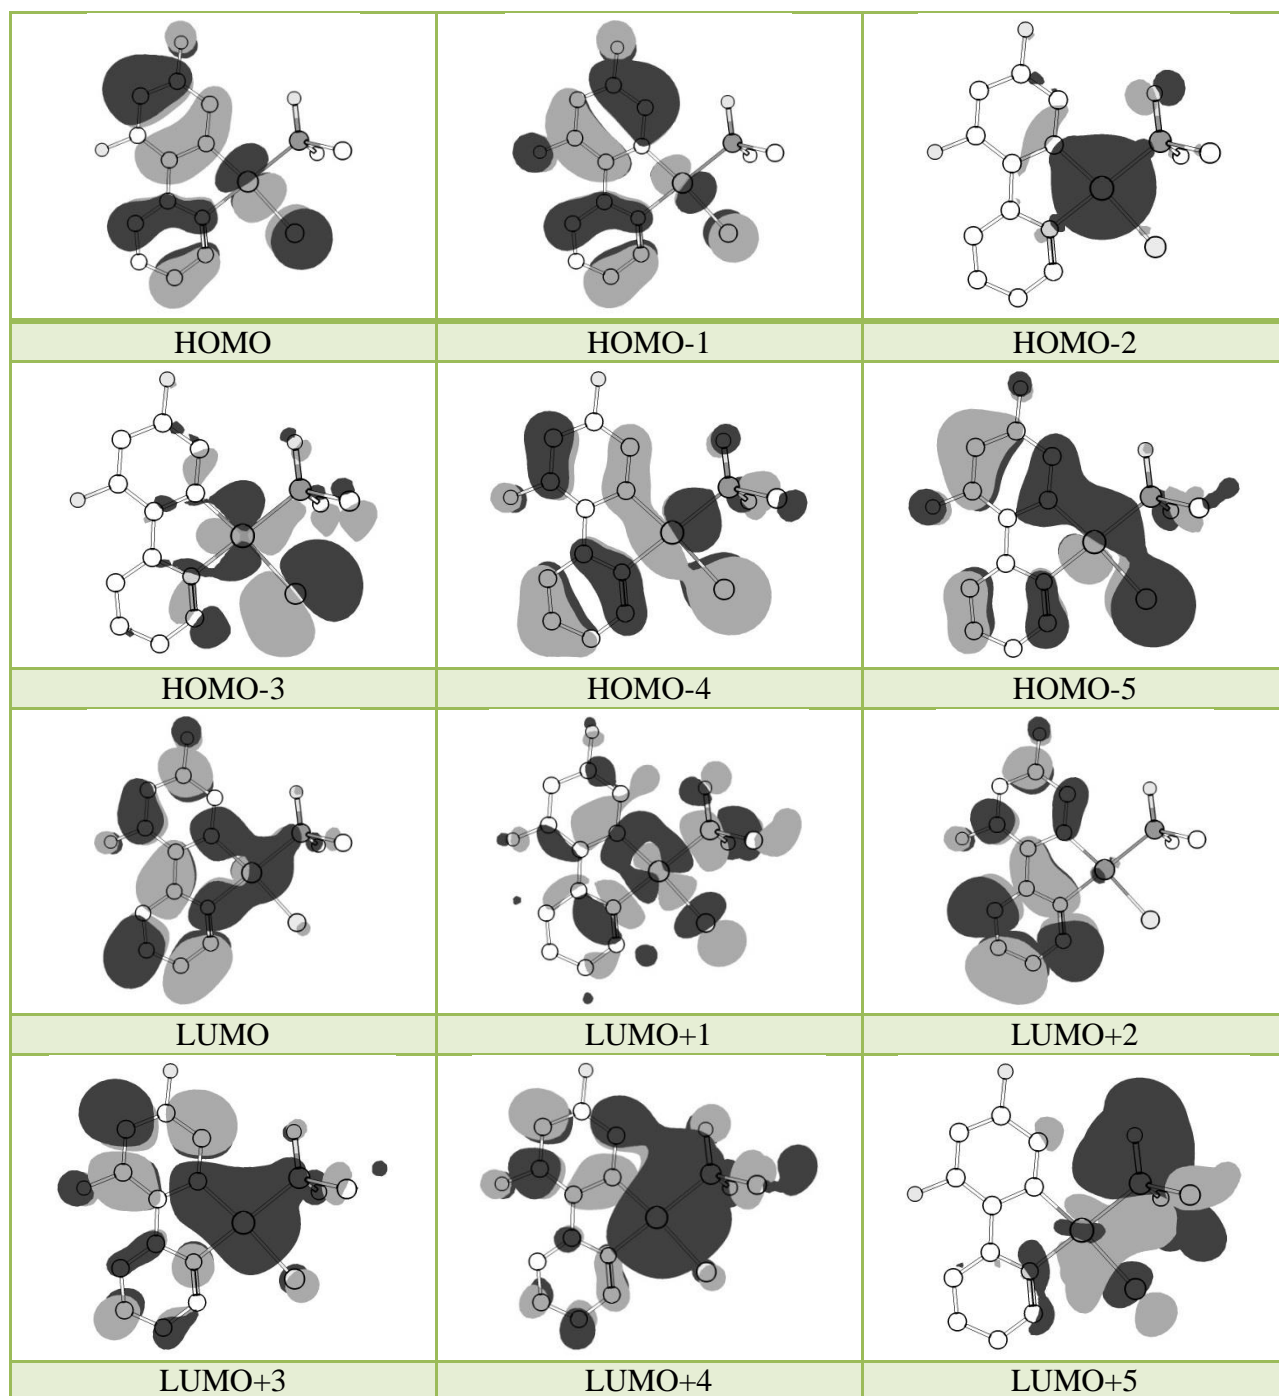

**Figure S21.** Molecular orbital plots for the optimized structure of **A** in CH<sub>2</sub>Cl<sub>2</sub> solution.

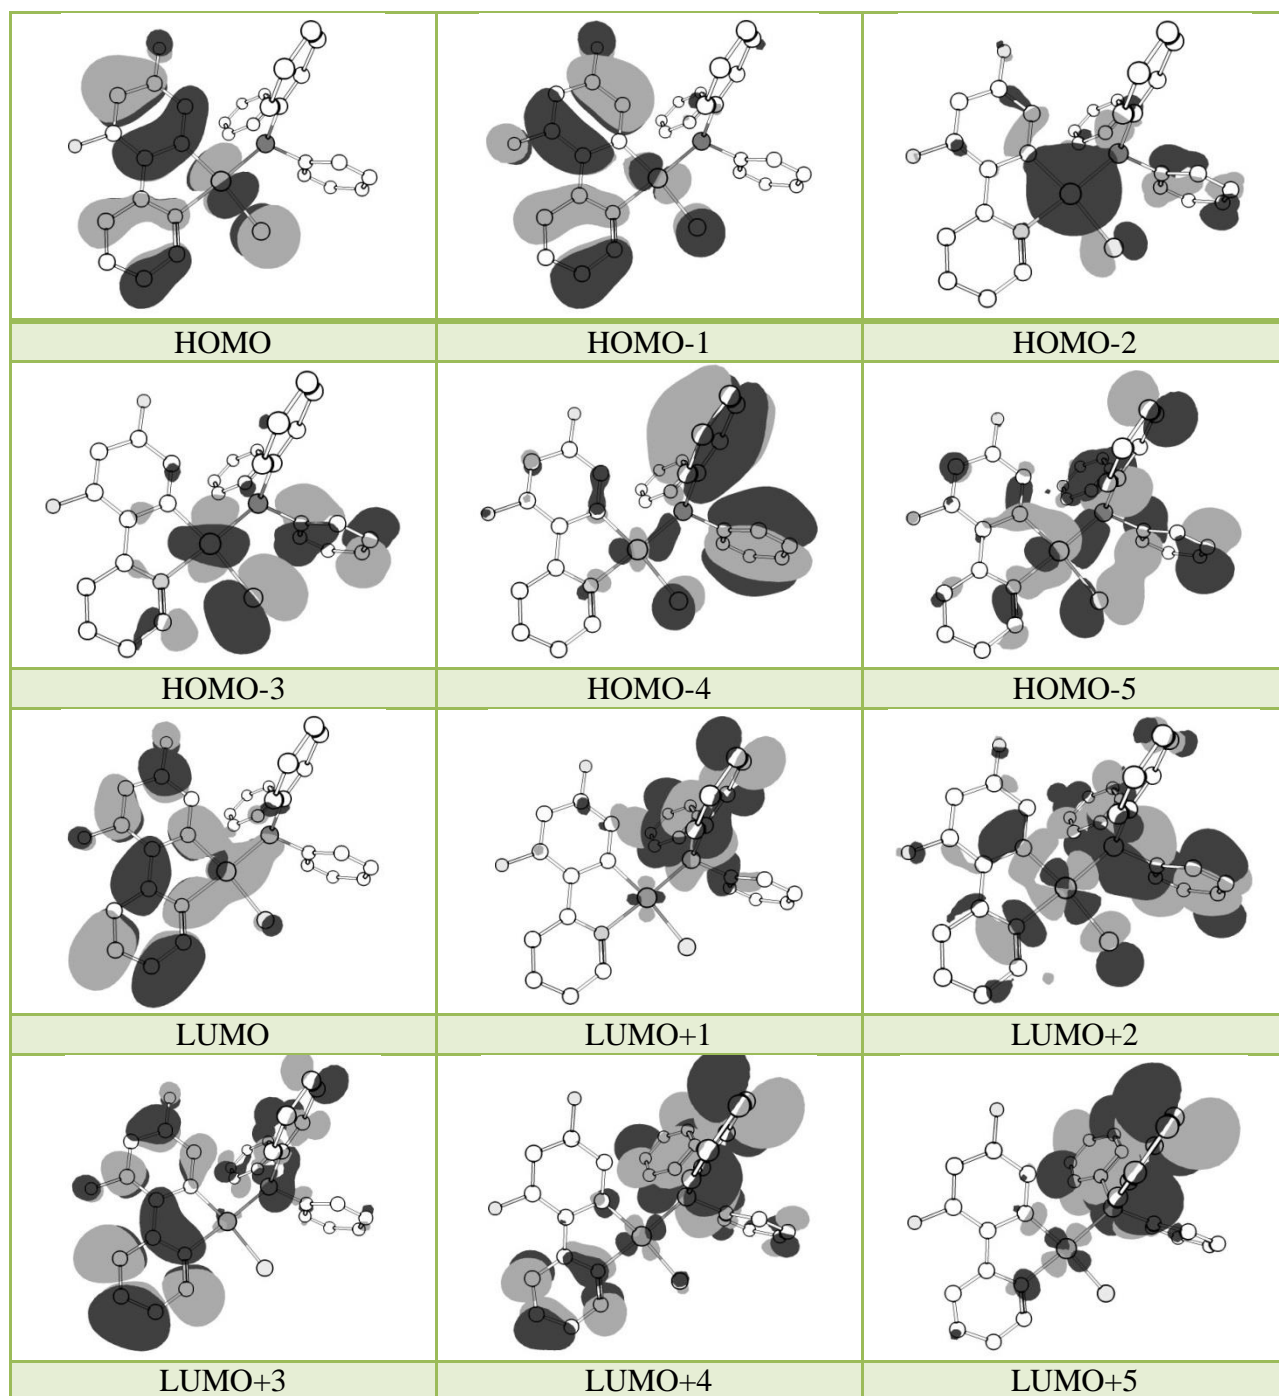

**Figure S22.** Molecular orbital plots for the optimized structure of **1a** in CH<sub>2</sub>Cl<sub>2</sub> solution.



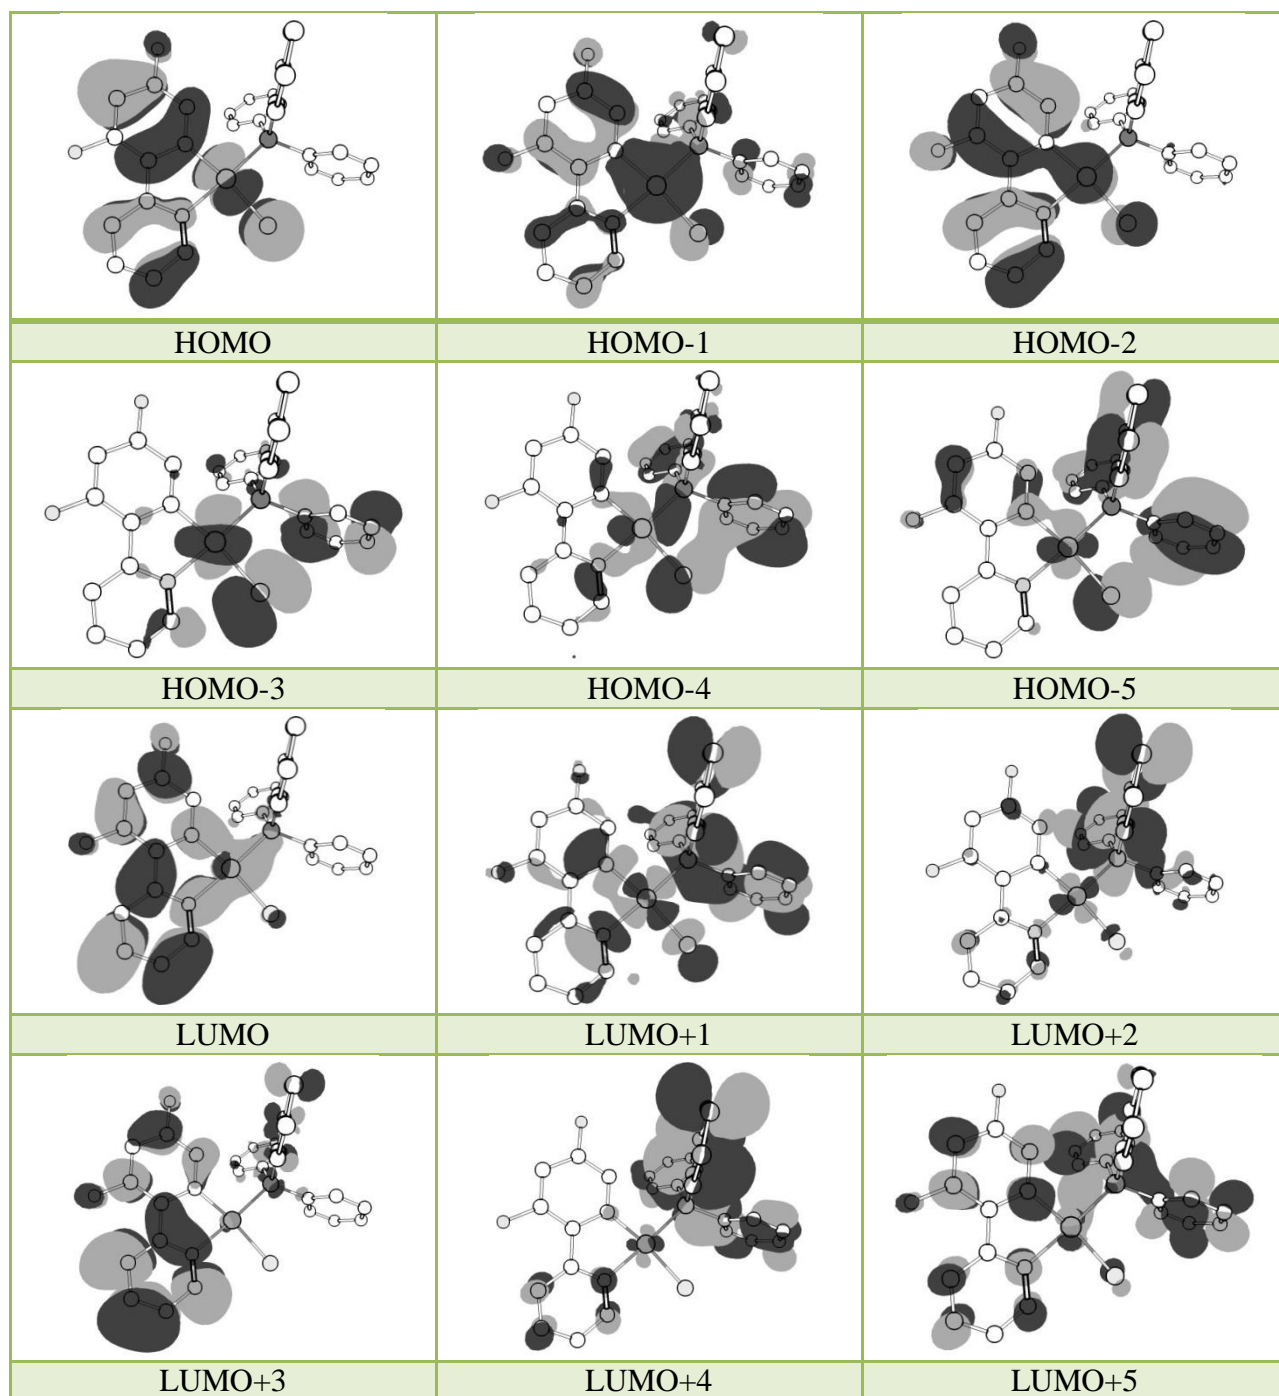

**Figure S23.** Molecular orbital plots for the optimized structure of **1b** in CH<sub>2</sub>Cl<sub>2</sub> solution.

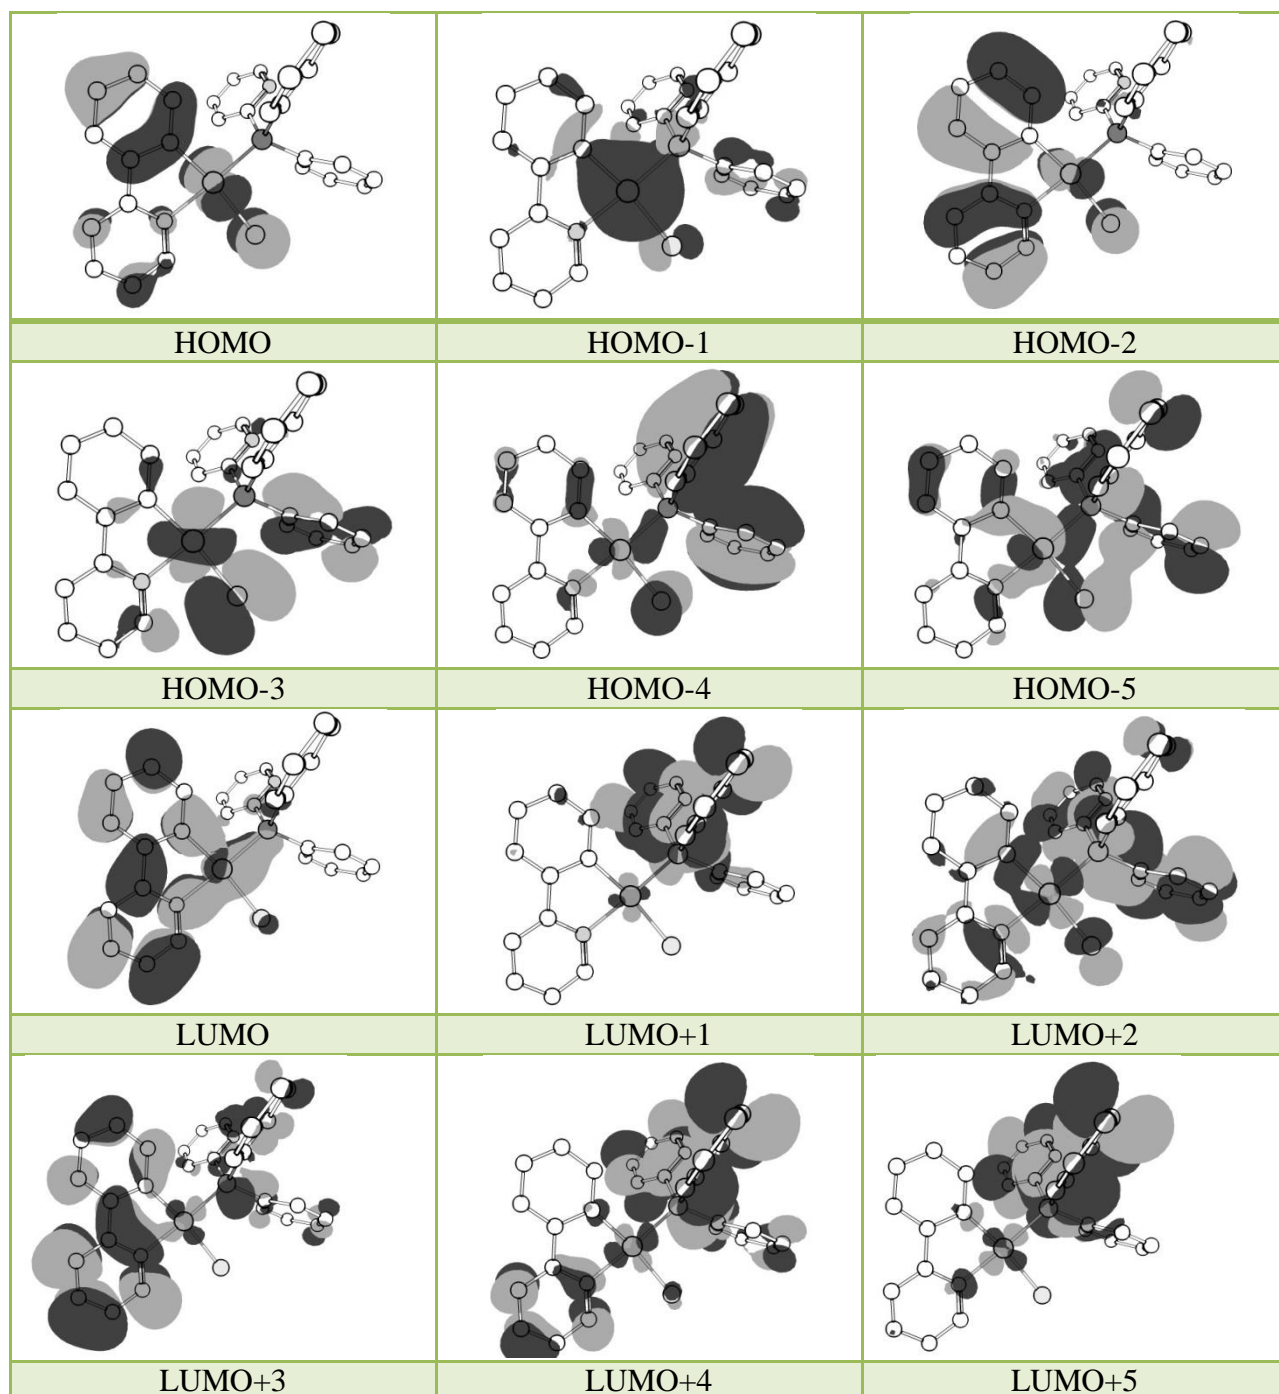

**Figure S24.** Molecular orbital plots for the optimized structure of **2a** in CH<sub>2</sub>Cl<sub>2</sub> solution.

**Table S5.** The energies of the selected molecular orbitals of **A** with their compositions in CH<sub>2</sub>Cl<sub>2</sub>.

| <b>A</b> |                |               |       |    |      |
|----------|----------------|---------------|-------|----|------|
| MO       | Energy<br>(eV) | Components(%) |       |    |      |
|          |                | Pt            | dfppy | Cl | dmsO |
| LUMO+5   | 0.357          | 22            | 11    | 5  | 62   |
| LUMO+4   | 0.357          | 23            | 28    | 1  | 48   |
| LUMO+3   | -0.381         | 15            | 71    | 1  | 13   |
| LUMO+2   | -1.108         | 1             | 98    | 0  | 1    |
| LUMO+1   | -1.243         | 37            | 27    | 6  | 30   |
| LUMO     | -1.964         | 6             | 88    | 1  | 5    |
| HOMO     | -6.171         | 39            | 48    | 12 | 0    |
| HOMO-1   | -6.536         | 12            | 82    | 6  | 0    |
| HOMO-2   | -6.701         | 91            | 6     | 0  | 3    |
| HOMO-3   | -7.145         | 22            | 6     | 69 | 3    |
| HOMO-4   | -7.307         | 49            | 23    | 23 | 5    |
| HOMO-5   | -7.443         | 38            | 26    | 32 | 4    |

**Table S6.** The energies of the selected molecular orbitals of **1a** with their compositions in CH<sub>2</sub>Cl<sub>2</sub>.

| <b>1a</b> |                |               |       |    |                     |
|-----------|----------------|---------------|-------|----|---------------------|
| MO        | Energy<br>(eV) | Components(%) |       |    |                     |
|           |                | Pt            | dfppy | Cl | PPh <sub>2</sub> py |
| LUMO+5    | -0.666         | 3             | 5     | 1  | 91                  |
| LUMO+4    | -0.851         | 4             | 16    | 1  | 79                  |
| LUMO+3    | -1.012         | 1             | 80    | 0  | 19                  |
| LUMO+2    | -1.143         | 29            | 16    | 5  | 49                  |
| LUMO+1    | -1.404         | 2             | 3     | 0  | 95                  |
| LUMO      | -1.813         | 6             | 87    | 1  | 6                   |
| HOMO      | -6.000         | 43            | 39    | 17 | 1                   |
| HOMO-1    | -6.455         | 10            | 81    | 6  | 3                   |
| HOMO-2    | -6.495         | 81            | 5     | 3  | 11                  |
| HOMO-3    | -6.651         | 23            | 5     | 52 | 20                  |
| HOMO-4    | -6.920         | 3             | 4     | 5  | 88                  |
| HOMO-5    | -6.991         | 21            | 8     | 15 | 56                  |

**Table S7.** The energies of the selected molecular orbitals of **1b** together with their compositions in CH<sub>2</sub>Cl<sub>2</sub>.

| <b>1b</b> |                |               |       |    |                  |
|-----------|----------------|---------------|-------|----|------------------|
| MO        | Energy<br>(eV) | Components(%) |       |    |                  |
|           |                | Pt            | dfppy | Cl | PPh <sub>3</sub> |
| LUMO+5    | -0.576         | 6             | 16    | 1  | 77               |
| LUMO+4    | -0.733         | 2             | 6     | 0  | 92               |
| LUMO+3    | -0.992         | 1             | 90    | 0  | 9                |
| LUMO+2    | -1.084         | 3             | 4     | 1  | 92               |
| LUMO+1    | -1.232         | 31            | 18    | 4  | 46               |
| LUMO      | -1.814         | 6             | 88    | 1  | 6                |
| HOMO      | -5.998         | 44            | 38    | 17 | 1                |
| HOMO-1    | -6.419         | 69            | 17    | 3  | 11               |
| HOMO-2    | -6.461         | 28            | 64    | 5  | 3                |
| HOMO-3    | -6.608         | 20            | 5     | 52 | 23               |
| HOMO-4    | -6.944         | 20            | 8     | 15 | 57               |
| HOMO-5    | -6.969         | 7             | 6     | 16 | 72               |

**Table S8.** The energies of the selected molecular orbitals of **2a** with their compositions in CH<sub>2</sub>Cl<sub>2</sub>.

| <b>2a</b> |                |               |     |    |                     |
|-----------|----------------|---------------|-----|----|---------------------|
| MO        | Energy<br>(eV) | Components(%) |     |    |                     |
|           |                | Pt            | ppy | Cl | PPh <sub>2</sub> py |
| LUMO+5    | -0.615         | 3             | 4   | 0  | 93                  |
| LUMO+4    | -0.825         | 4             | 12  | 1  | 83                  |
| LUMO+3    | -1.031         | 4             | 77  | 1  | 18                  |
| LUMO+2    | -1.051         | 27            | 16  | 4  | 53                  |
| LUMO+1    | -1.371         | 1             | 3   | 1  | 95                  |
| LUMO      | -1.746         | 5             | 88  | 1  | 6                   |
| HOMO      | -5.811         | 45            | 39  | 15 | 1                   |
| HOMO-1    | -6.397         | 83            | 5   | 2  | 10                  |
| HOMO-2    | -6.464         | 8             | 83  | 6  | 3                   |
| HOMO-3    | -6.589         | 22            | 5   | 56 | 16                  |
| HOMO-4    | -6.879         | 6             | 5   | 8  | 81                  |
| HOMO-5    | -6.924         | 18            | 10  | 15 | 57                  |

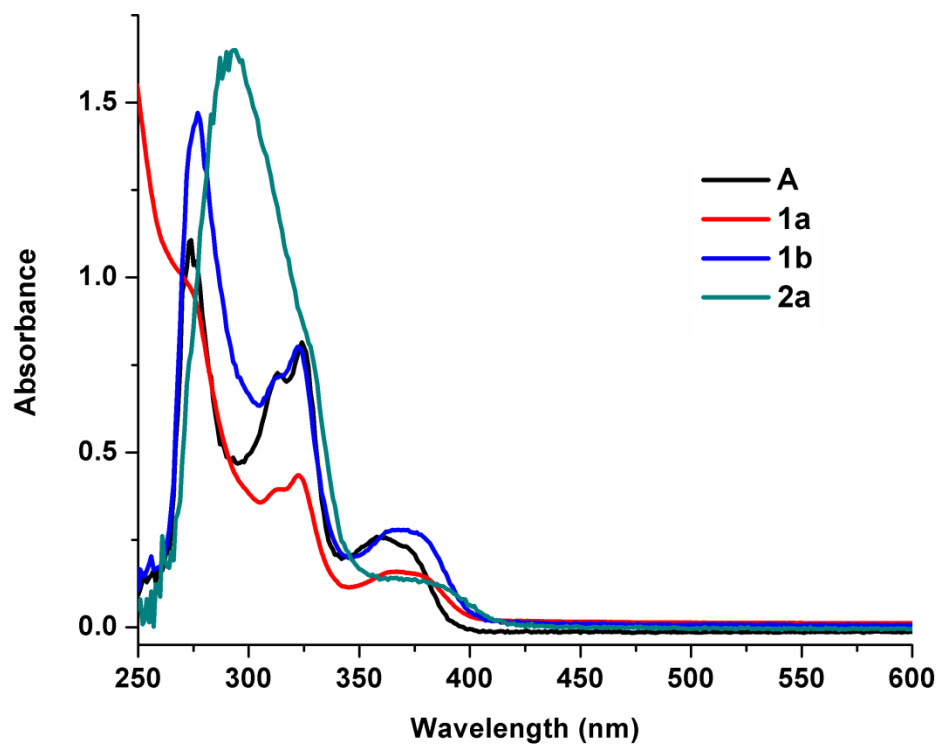

**Figure S25.** The absorption spectra of **A**, **1a–b** and **2a** in  $\text{CH}_2\text{Cl}_2$  at 298 K ( $10^{-5}$  M).

**Table S9.** The absorption data of **A**, **1a–b** and **2a** in  $\text{CH}_2\text{Cl}_2$  solutions ( $10^{-5}$  M).

| Complex   | Absorption / nm ( $10^5 \epsilon/\text{M}^{-1} \text{cm}^{-1}$ ) |
|-----------|------------------------------------------------------------------|
| <b>A</b>  | 360 (0.279), 323 (0.823), 312 (0.741), 273 (1.128)               |
| <b>1a</b> | 370 (0.172), 323 (0.449), 312 (0.417), 272 (0.991)               |
| <b>1b</b> | 371 (0.291), 323 (0.828), 312 (0.735), 276 (1.480)               |
| <b>2a</b> | 377 (0.138), 327 (0.849), 293 (1.660)                            |

**Table S10.** Wavelengths and the nature of transitions for **A** where M = Pt, L = dfppy, L' = dmsO and X = Cl.

| Excited state                   | Oscillator strength | Calculated $\lambda$ (nm) | Transitions (Major Contribution) | Assignment     |
|---------------------------------|---------------------|---------------------------|----------------------------------|----------------|
| S <sub>0</sub> →S <sub>1</sub>  | 0.0486              | 359.75                    | HOMO→LUMO (95%)                  | ILCT/MLCT/XLCT |
| S <sub>0</sub> →S <sub>5</sub>  | 0.1830              | 309.91                    | H-1→LUMO (82%)                   | ILCT/MLCT      |
| S <sub>0</sub> →S <sub>6</sub>  | 0.1139              | 283.70                    | HOMO→L+2 (79%)                   | ILCT/MLCT/XLCT |
|                                 |                     |                           | H-4→LUMO (14%)                   | MLCT/ILCT/XLCT |
| S <sub>0</sub> →S <sub>10</sub> | 0.1407              | 269.46                    | H-4→LUMO (56%)                   | MLCT/ILCT/XLCT |
|                                 |                     |                           | H-1→L+2 (16%)                    | ILCT/MLCT      |
|                                 |                     |                           | H-5→LUMO (11%)                   | MLCT/ILCT/XLCT |
|                                 |                     |                           | HOMO→L+2 (10%)                   | ILCT/MLCT/XLCT |

**Table S11.** Wavelengths and the nature of transitions for **1a** where M = Pt, L = dfppy, L' = PPh<sub>2</sub>py and X = Cl.

| Excited state                   | Oscillator strength | Calculated $\lambda$ (nm) | Transitions (Major Contribution) | Assignment           |
|---------------------------------|---------------------|---------------------------|----------------------------------|----------------------|
| S <sub>0</sub> →S <sub>1</sub>  | 0.0571              | 360.97                    | HOMO→LUMO (97%)                  | ILCT/MLCT/XLCT       |
| S <sub>0</sub> →S <sub>5</sub>  | 0.0617              | 308.30                    | H-1→LUMO (49%)                   | ILCT                 |
|                                 |                     |                           | H-2→L+2 (29%)                    | ML'CT/MLCT           |
| S <sub>0</sub> →S <sub>6</sub>  | 0.0924              | 303.40                    | H-2→L+2 (46%)                    | ML'CT/MLCT           |
|                                 |                     |                           | H-1→LUMO (29%)                   | ILCT                 |
| S <sub>0</sub> →S <sub>8</sub>  | 0.0502              | 287.49                    | HOMO→L+3 (76%)                   | ILCT/MLCT/XLCT/ML'CT |
| S <sub>0</sub> →S <sub>11</sub> | 0.0176              | 275.08                    | H-1→L+1 (89%)                    | LL'CT                |

**Table S12.** Wavelengths and the nature of transitions for **1b** where M = Pt, L = dfppy, L' = PPh<sub>3</sub> and X = Cl.

| Excited state                   | Oscillator strength | Calculated $\lambda$ (nm) | Transitions (Major Contribution) | Assignment                        |
|---------------------------------|---------------------|---------------------------|----------------------------------|-----------------------------------|
| S <sub>0</sub> →S <sub>1</sub>  | 0.0565              | 361.79                    | HOMO→LUMO (96%)                  | ILCT/MLCT/XLCT                    |
| S <sub>0</sub> →S <sub>5</sub>  | 0.1460              | 306.45                    | H-2→LUMO (68%)<br>H-1→LUMO (15%) | ILCT/MLCT<br>MLCT/ILCT            |
| S <sub>0</sub> →S <sub>11</sub> | 0.2361              | 275.96                    | H-6→LUMO (56%)<br>HOMO→L+3 (11%) | MLCT/L'LCT/ILCT<br>ILCT/MLCT/XLCT |

**Table S13.** Wavelengths and the nature of transitions for **2a** where M = Pt, L = ppy, L' = PPh<sub>2</sub>py and X = Cl.

| Excited state                   | Oscillator strength | Calculated $\lambda$ (nm) | Transitions (Major Contribution) | Assignment                         |
|---------------------------------|---------------------|---------------------------|----------------------------------|------------------------------------|
| S <sub>0</sub> →S <sub>1</sub>  | 0.0595              | 373.47                    | HOMO→LUMO (98%)                  | ILCT/MLCT/XLCT                     |
| S <sub>0</sub> →S <sub>5</sub>  | 0.0267              | 306.60                    | HOMO→L+3 (45%)<br>H-2→LUMO (39%) | ILCT/MLCT/ML'CT<br>ILCT            |
| S <sub>0</sub> →S <sub>8</sub>  | 0.1758              | 295.09                    | H-2→LUMO (52%)<br>HOMO→L+3 (25%) | ILCT<br>ILCT/MLCT/ML'CT            |
| S <sub>0</sub> →S <sub>12</sub> | 0.1820              | 274.60                    | H-6→LUMO (37%)<br>H-7→LUMO (28%) | L'LCT/MLCT<br>MLCT/L'LCT/ILCT/XLCT |

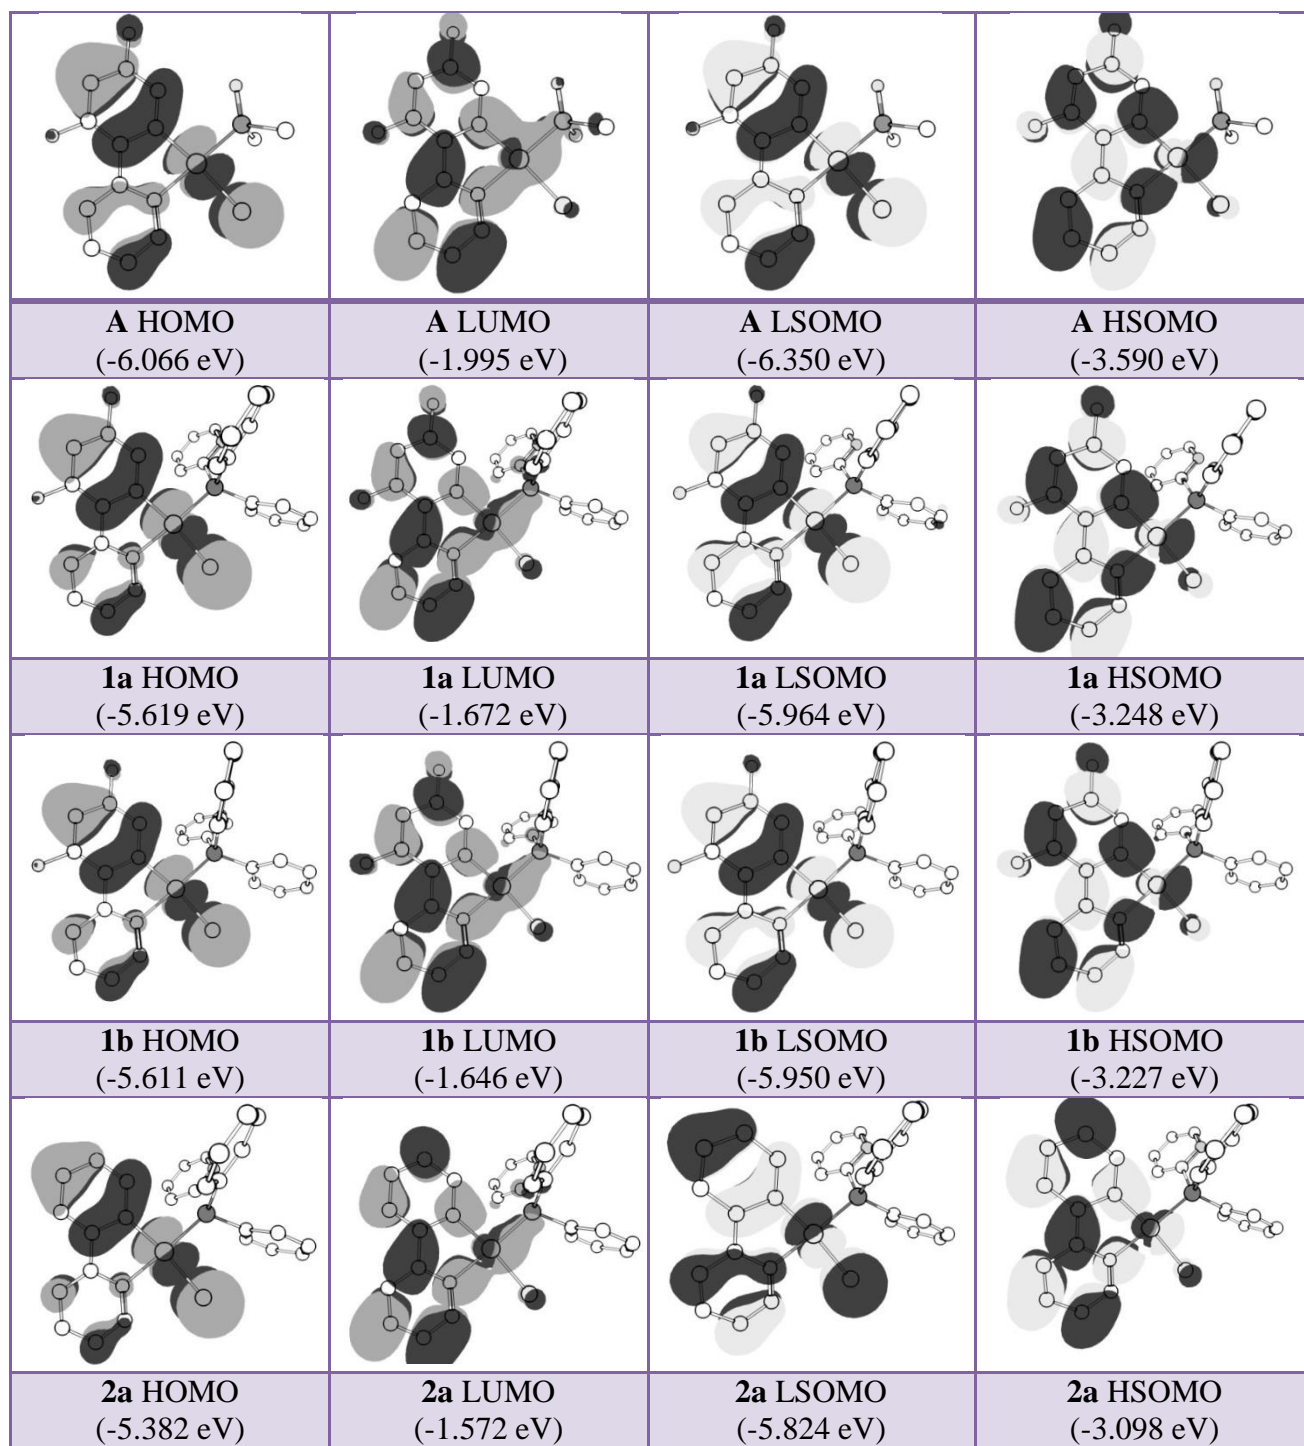

**Figure S26.** Frontier molecular orbital plots of **A**, **1a–b** and **2a** in  $S_0$  and  $T_1$  states and gas phase.



## References

1. M. Fereidoonzhad, M. Niazi, Z. Ahmadipour, T. Mirzaee, Z. Faghieh, Z. Faghieh and H. R. Shamsavari, *Eur. J. Inorg. Chem.*, 2017, 2247-2254.
